# Supplementary material for: Synthesis of a half-sandwich complex of ruthenium(ii) with a nonsymmetric bis-nitrogen donor ligand: biological investigations
Source: Royal Society of Chemistry journal article supplement (doi:10.1039/d2nj06075b), 2023-01-01
Supplement: d2nj06075b1.pdf [file d2nj06075b1.pdf]

## Electronic Supplementary Information

### Synthesis of a Half-Sandwich Complex of Ruthenium(II) with a Nonsymmetric Bis-Nitrogen Donor Ligand: Biological Investigations

Sana Yarahmadi,<sup>a</sup> Elham Jokar,<sup>b,c</sup> Zahra Shamsi,<sup>a</sup> Dalia Nahieh,<sup>b,c</sup> Mehrnoosh Moosavi,<sup>b</sup> Masood Fereidoonnezhad,<sup>b,c\*</sup> and Hamid R. Shahsavari<sup>a\*</sup>

<sup>a</sup>Department of Chemistry, Institute for Advanced Studies in Basic Sciences (IASBS), Zanjan 45137-66731, Iran. \*E-mail: shahsavari@iasbs.ac.ir.

<sup>b</sup>Toxicology Research Center, Medical Basic Sciences Research Institute, Ahvaz Jundishapur University of Medical Sciences, Ahvaz, Iran.

<sup>c</sup>Department of Medicinal Chemistry, Faculty of Pharmacy, Ahvaz Jundishapur University of Medical Sciences, Ahvaz, Iran. \*E-mail: fereidoonnezhad-m@ajums.ac.ir.

| Contents:                                                                                                                                                                                                       | Page |
|-----------------------------------------------------------------------------------------------------------------------------------------------------------------------------------------------------------------|------|
| <b>Figure S1.</b> <sup>1</sup> H NMR spectrum of <b>1</b> in dmsd-d <sub>6</sub> .                                                                                                                              | S3   |
| <b>Figure S2.</b> <sup>13</sup> C{ <sup>1</sup> H} NMR spectrum of <b>1</b> in dmsd-d <sub>6</sub> .                                                                                                            | S3   |
| <b>Figure S3.</b> DEPT-135° spectrum of <b>1</b> in dmsd-d <sub>6</sub> .                                                                                                                                       | S4   |
| <b>Figure S4.</b> <sup>1</sup> H <sup>1</sup> H COSY spectrum of <b>1</b> in dmsd-d <sub>6</sub> .                                                                                                              | S4   |
| <b>Figure S5.</b> HSQC spectrum of <b>1</b> in dmsd-d <sub>6</sub> .                                                                                                                                            | S5   |
| <b>Figure S6.</b> HMBC spectrum of <b>1</b> in dmsd-d <sub>6</sub> .                                                                                                                                            | S5   |
| <b>Figure S7.</b> HR ESI-Mass spectrum of <b>1</b> . Inset shows the calculated pattern.                                                                                                                        | S6   |
| <b>Figure S8.</b> Partial view of crystal packing of <b>1</b> .                                                                                                                                                 | S6   |
| <b>Figure S9.</b> View of the optimized structures of <b>A</b> (middle), <b>B</b> (left), and <b>1</b> (right) in dmsd with the atom numbering (the chloride counter anion is omitted in <b>1</b> for clarity). | S7   |
| <b>Table S1.</b> Selected bond distances (Å) and angles (deg) for the calculated (S <sub>0</sub> in gas phase and in dmsd) of <b>A</b> .                                                                        | S7   |
| <b>Table S2.</b> Selected bond distances (Å) and angles (deg) for the calculated (S <sub>0</sub> in gas phase and in dmsd) of <b>1</b> .                                                                        | S8   |
| <b>Figure S10.</b> Molecular orbital plots for the optimized structure of <b>A</b> in gas phase.                                                                                                                | S9   |
| <b>Figure S11.</b> Molecular orbital plots for the optimized structure of <b>A</b> in dmsd solution.                                                                                                            | S10  |
| <b>Figure S12.</b> Molecular orbital plots for the optimized structure of <b>B</b> in gas phase.                                                                                                                | S11  |

|                                                                                                                                                                                                                              |     |
|------------------------------------------------------------------------------------------------------------------------------------------------------------------------------------------------------------------------------|-----|
| <b>Figure S13.</b> Molecular orbital plots for the optimized structure of <b>B</b> in dmsO solution.                                                                                                                         | S12 |
| <b>Figure S14.</b> Molecular orbital plots for the optimized structure of <b>1</b> in gas phase.                                                                                                                             | S13 |
| <b>Figure S15.</b> Molecular orbital plots for the optimized structure of <b>1</b> in dmsO solution.                                                                                                                         | S14 |
| <b>Table S3.</b> The energies of the selected molecular orbitals of <b>1</b> with their compositions in gas phase.                                                                                                           | S15 |
| <b>Table S4.</b> The energies of the selected molecular orbitals of <b>1</b> with their compositions in dmsO solution.                                                                                                       | S15 |
| <b>Table S5.</b> The energies of the selected molecular orbitals of <b>A</b> with their compositions in dmsO solution.                                                                                                       | S16 |
| <b>Table S6.</b> The energies of the selected molecular orbitals of <b>1</b> with their compositions in gas phase.                                                                                                           | S16 |
| <b>Table S7.</b> The energies of the selected molecular orbitals of <b>1</b> with their compositions in dmsO solution.                                                                                                       | S17 |
| <b>Figure S16.</b> TD-DFT calculated (Red line) and experimental (Black line) UV-vis spectra of <b>A</b> in dmsO obtained with the mixed basis set 6-31(g)d/LanL2DZ and the functional B3LYP.                                | S17 |
| <b>Figure S17.</b> TD-DFT calculated (Green bars) and experimental (Black line) UV-vis spectra of <b>B</b> in dmsO obtained with the mixed basis set 6-31(g)d/LanL2DZ and the functional B3LYP.                              | S18 |
| <b>Figure S18.</b> TD-DFT calculated (Red line) and experimental (Black line) UV-vis spectra of <b>1</b> in dmsO obtained with the mixed basis set 6-31(g)d/LanL2DZ and the functionals B3LYP (a), WB97XD (b).               | S18 |
| <b>Figure S19.</b> TD-DFT calculated (Red lines) and experimental (Black lines) UV-vis spectra of <b>1</b> in dmsO obtained with the functional WB97XD and the mixed basis sets 6-31(g)d/LanL2DZ (a), Def2TZVP /LanL2DZ (b). | S19 |
| <b>Table S8.</b> Wavelengths and the nature of transitions for <b>1</b> in dmsO solution where M = Ru, L <sub>1</sub> = bpyNO, L <sub>2</sub> = <i>p</i> -cymene and L <sub>3</sub> = Cl.                                    | S20 |
| <b>Table S9.</b> Crystallographic and structure refinement data for <b>1</b> .                                                                                                                                               | S21 |
| <b>Figure S20.</b> Time course UV-vis spectra of <b>A</b> ( $5 \times 10^{-5}$ M) dissolved in dmsO. The spectra were recorded over 72 hours at room temperature.                                                            | S22 |
| <b>Figure S21.</b> Time course UV-vis spectra of <b>B</b> ( $5 \times 10^{-5}$ M) dissolved in dmsO. The spectra were recorded over 72 hours at room temperature.                                                            | S22 |
| <b>Figure S22.</b> Time course UV-vis spectra of <b>1</b> ( $5 \times 10^{-5}$ M) dissolved in dmsO. The spectra were recorded over 72 hours at room temperature.                                                            | S23 |
| <b>Figure S23.</b> Time course <sup>1</sup> H NMR spectrum of <b>A</b> in dmsO- <i>d</i> <sub>6</sub> at room temperature.                                                                                                   | S24 |
| <b>Figure S24.</b> Time course <sup>1</sup> H NMR spectrum of <b>B</b> in dmsO- <i>d</i> <sub>6</sub> at room temperature.                                                                                                   | S25 |
| <b>Figure S25.</b> Time course <sup>1</sup> H NMR spectrum of <b>1</b> in dmsO- <i>d</i> <sub>6</sub> at room temperature.                                                                                                   | S26 |
| <b>Figure S26.</b> Time course <sup>1</sup> H NMR spectrum of <b>1</b> in D <sub>2</sub> O at room temperature.                                                                                                              | S27 |
| <b>Figure S27.</b> Time course <sup>1</sup> H NMR spectrum of <b>1</b> in a mixture of dmsO- <i>d</i> <sub>6</sub> /D <sub>2</sub> O at room temperature.                                                                    | S28 |
| <b>Figure S28.</b> <sup>1</sup> H NMR spectrum of <b>2</b> in dmsO- <i>d</i> <sub>6</sub> .                                                                                                                                  | S29 |
| <b>Figure S29.</b> Time course <sup>1</sup> H NMR spectrum of <b>2</b> in dmsO- <i>d</i> <sub>6</sub> at room temperature.                                                                                                   | S30 |
| <b>Experimental</b>                                                                                                                                                                                                          | S31 |
| <b>Cartesian coordinates</b>                                                                                                                                                                                                 | S35 |
| <b>References</b>                                                                                                                                                                                                            | S42 |

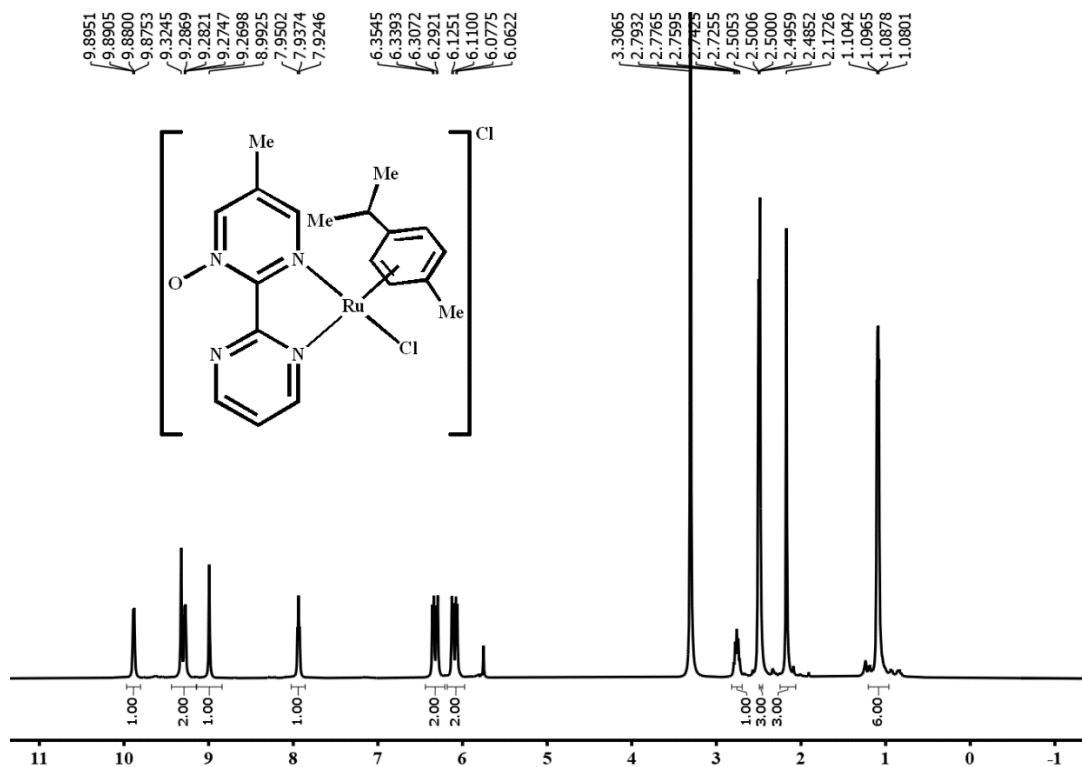

**Figure S1.**  $^1\text{H}$  NMR spectrum of **1** in  $\text{dms0-d}_6$ .

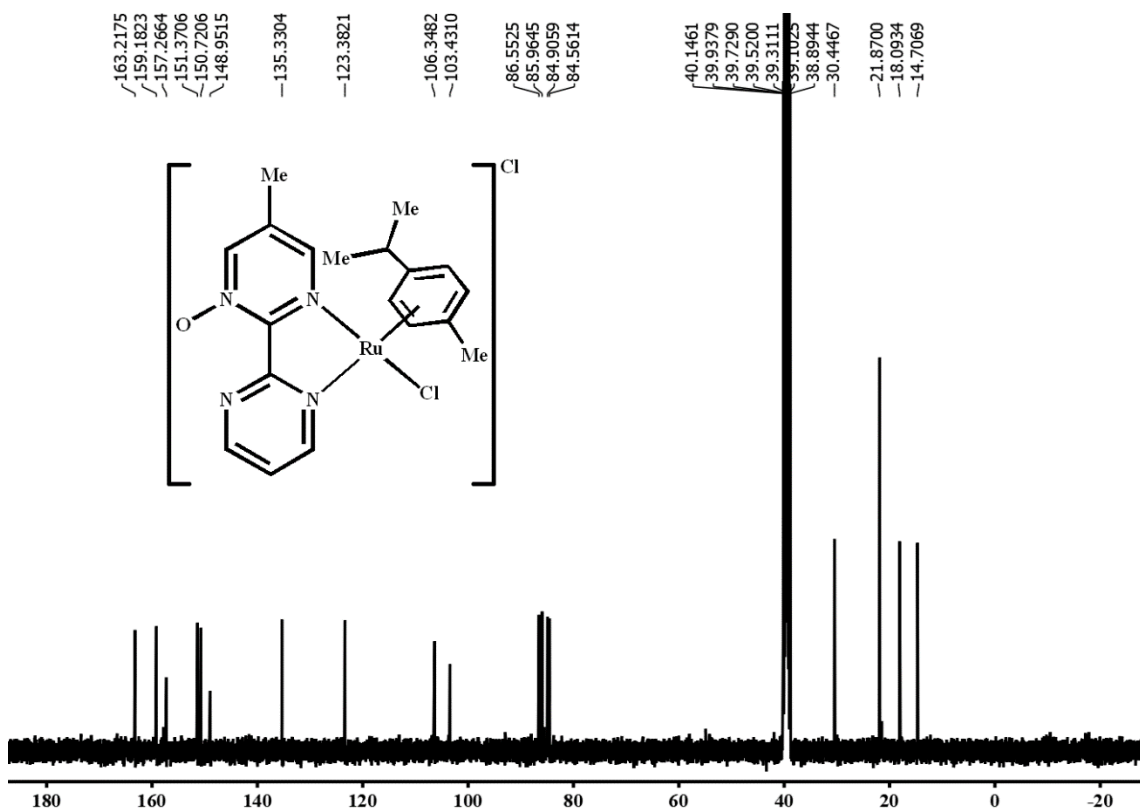

**Figure S2.**  $^{13}\text{C}\{^1\text{H}\}$  NMR spectrum of **1** in  $\text{dms0-d}_6$ .

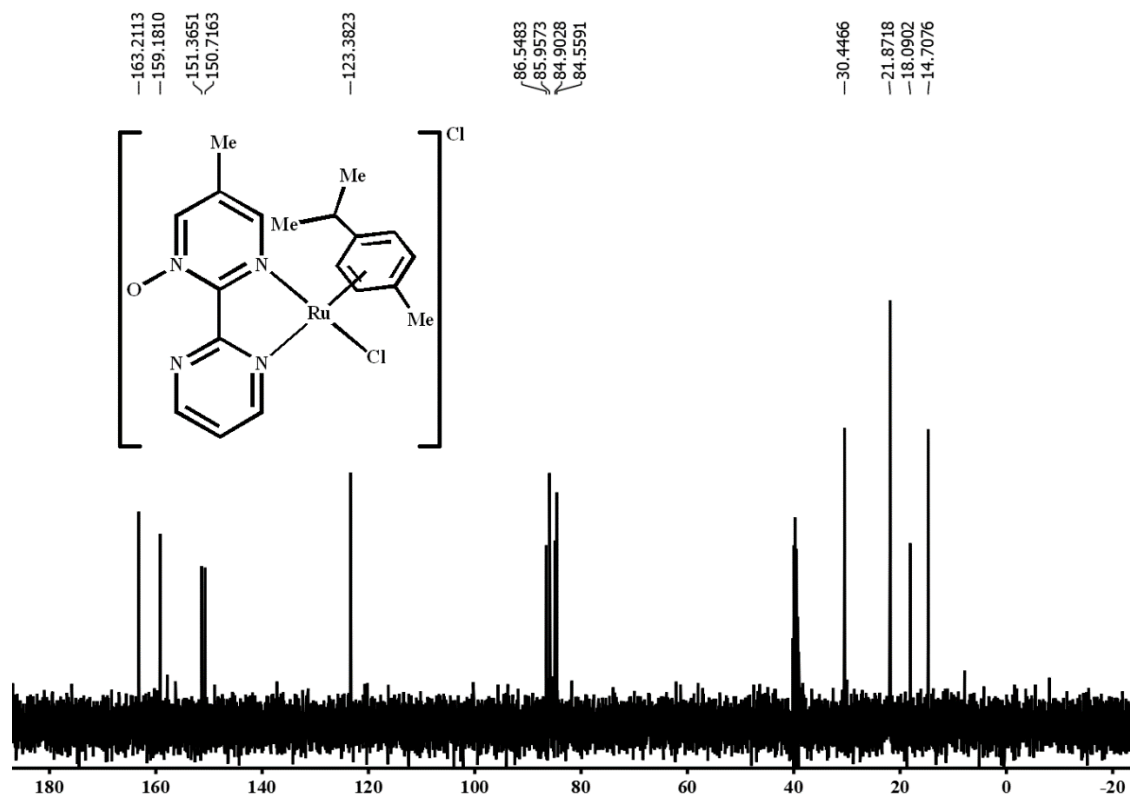

Figure S3. DEPT-135° spectrum of **1** in dms0-*d*<sub>6</sub>.

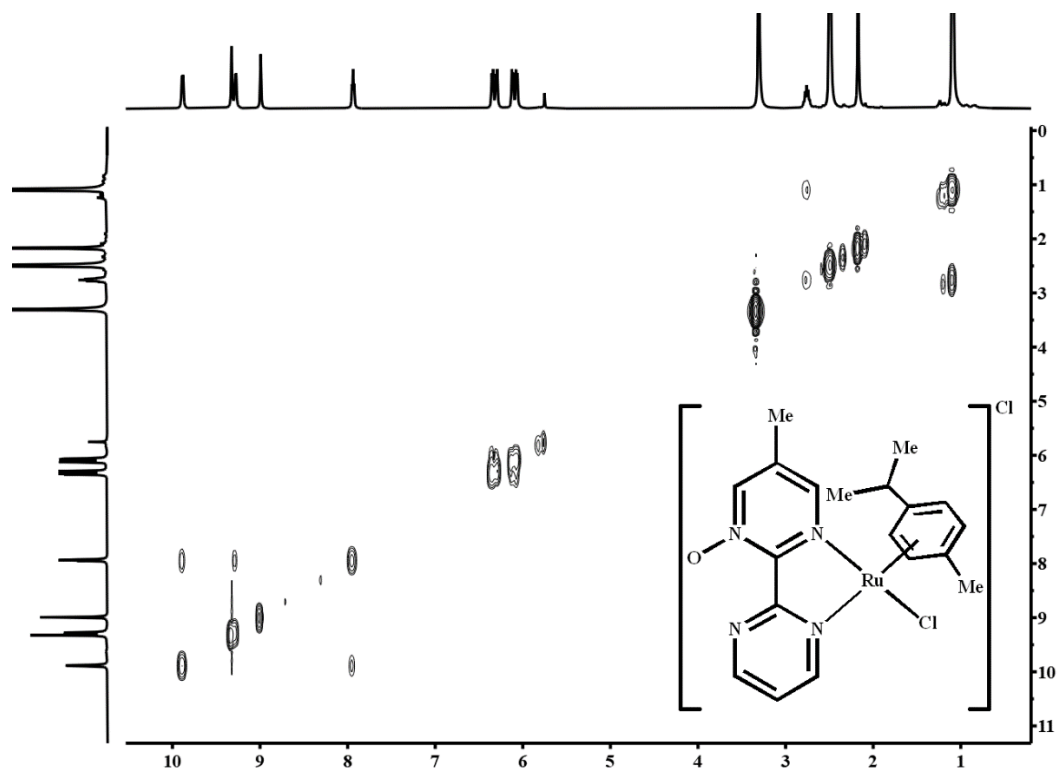

Figure S4. <sup>1</sup>H<sup>1</sup>H COSY spectrum of **1** in dms0-*d*<sub>6</sub>.

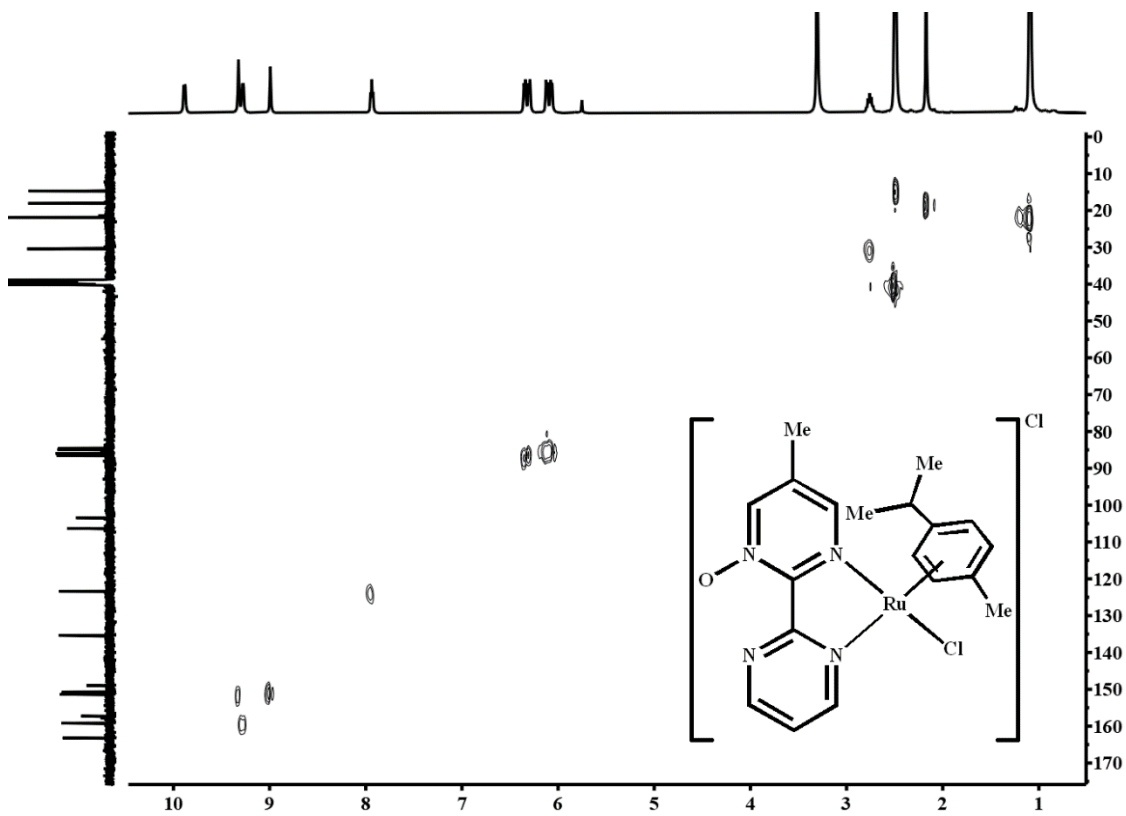

Figure S5. HSQC spectrum of **1** in dms0-*d*<sub>6</sub>.

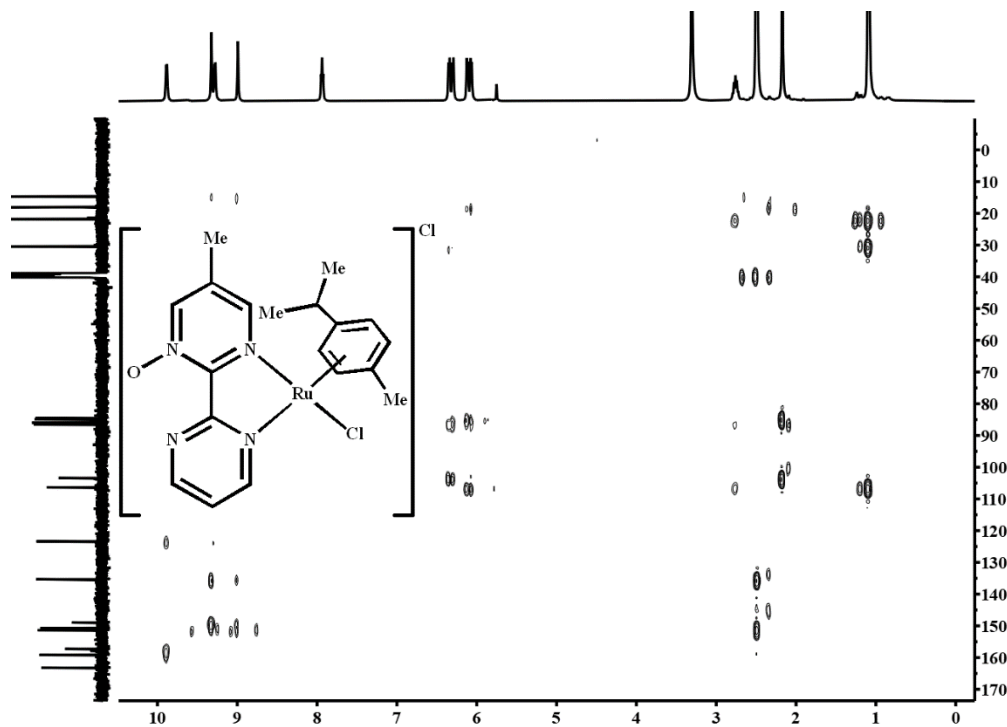

Figure S6. HMBC spectrum of **1** in dms0-*d*<sub>6</sub>.

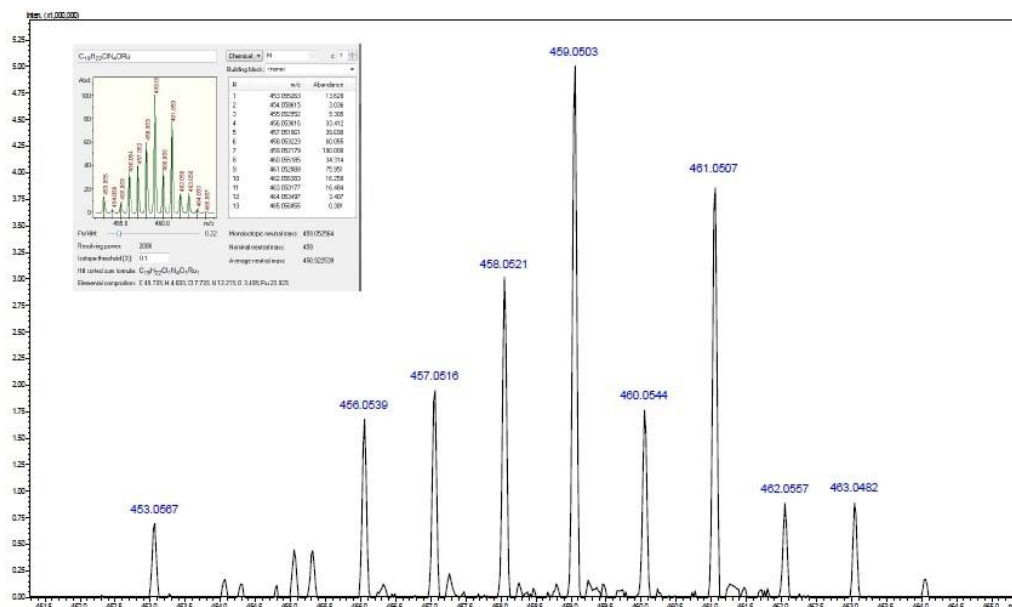

**Figure S7.** HR ESI-Mass spectrum of **1**. Inset shows the calculated pattern.

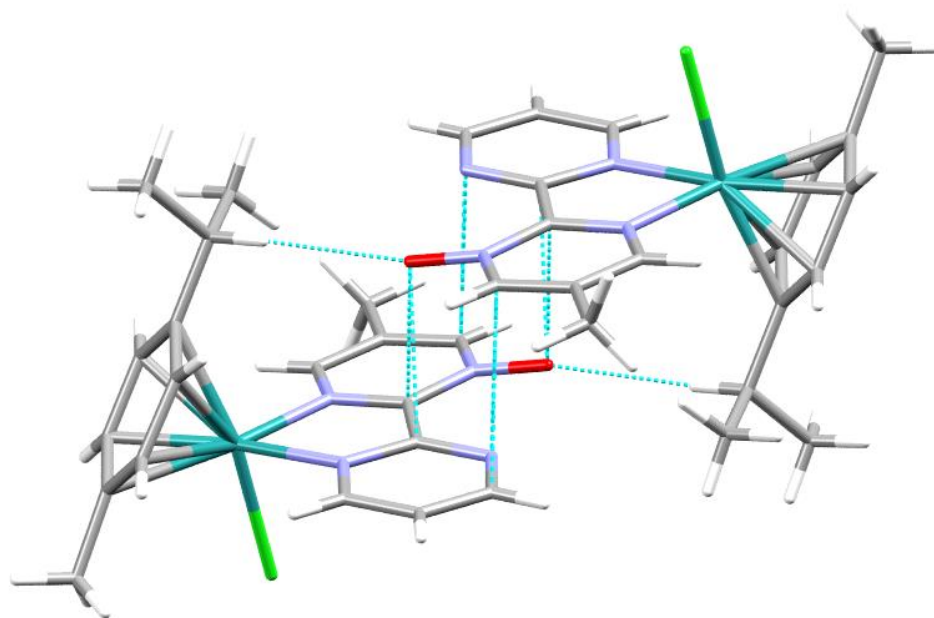

**Figure S8.** Partial view of crystal packing of **1**.

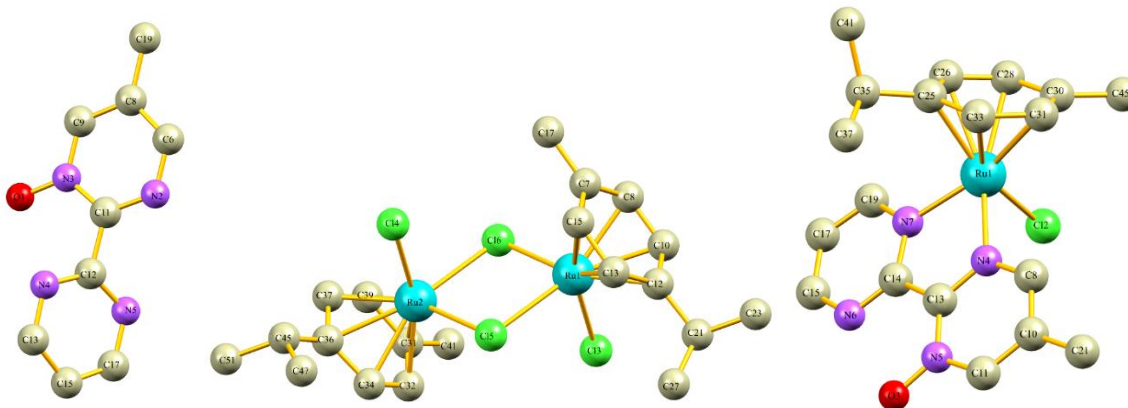

**Figure S9.** View of the optimized structures of **A** (middle), **B** (left), and **1** (right) in dmsu with the atom numbering (the chloride counter anion is omitted in **1** for clarity).

**Table S1.** Selected bond distances ( $\text{\AA}^\circ$ ) and angles (deg) for the calculated ( $S_0$  in gas phase and in dmsu) of **A**.

| Bond distance or angle     | Crystal Structure | $S_0$ (gas phase) | $S_0$ (dmsu) |
|----------------------------|-------------------|-------------------|--------------|
| Ru(1)-Cl(3)                | 2.416(3)          | 2.434             | 2.469        |
| Ru(1)-Cl(5)                | 2.451             | 2.504             | 2.530        |
| Ru(1)-Cl(6)                | 2.464             | 2.504             | 2.531        |
| Ru(1)-Ring(Centroid)       | 1.658             | 1.719             | 1.738        |
| Cl(3)-Ru(1)-Cl(6)          | 85.22             | 87.89             | 87.53        |
| Cl(5)-Ru(1)-Cl(6)          | 82.53             | 82.77             | 82.00        |
| Cl(3)-Ru(1)-Cl(5)          | 87.18             | 88.01             | 87.53        |
| Cl(5)-Ru(1)-Ring(Centroid) | 127.98            | 127.24            | 128.86       |
| Cl(6)-Ru(1)-Ring(Centroid) | 128.82            | 127.54            | 128.70       |
| Cl(3)-Ru(1)-Ring(Centroid) | 128.88            | 128.70            | 127.60       |

**Table S2.** Selected bond distances (Å) and angles (deg) for the calculated (S<sub>0</sub> in gas phase and in dmsO) of **1**.

| <b>Bond distance or angle</b> | <b>Crystal Structure</b> | <b>S<sub>0</sub> (gas phase)</b> | <b>S<sub>0</sub> (dmsO)</b> |
|-------------------------------|--------------------------|----------------------------------|-----------------------------|
| Ru(1)-Cl(1)                   | 2.401(7)                 | 2.4132                           | 2.4584                      |
| Ru(1)-N(1)                    | 2.097(2)                 | 2.1140                           | 2.1128                      |
| Ru(1)-N(4)                    | 2.077(2)                 | 2.0875                           | 2.0899                      |
| Ru(1)-Ring(Centroid)          | 1.683                    | 1.812                            | 1.813                       |
| N(1)-Ru(1)-N(4)               | 77.07(8)                 | 76.99                            | 76.78                       |
| Cl(1)-Ru(1)-N(1)              | 82.76(6)                 | 84.77                            | 85.48                       |
| Cl(1)-Ru(1)-N(4)              | 84.49(6)                 | 84.19                            | 85.15                       |
| Cl(1)-Ru(1)-Ring(Centroid)    | 129.16                   | 125.57                           | 126.55                      |
| N(1)-Ru(1)-Ring(Centroid)     | 133.39                   | 133.32                           | 132.22                      |
| N(4)-Ru(1)-Ring(Centroid)     | 130.84                   | 133.58                           | 133.66                      |



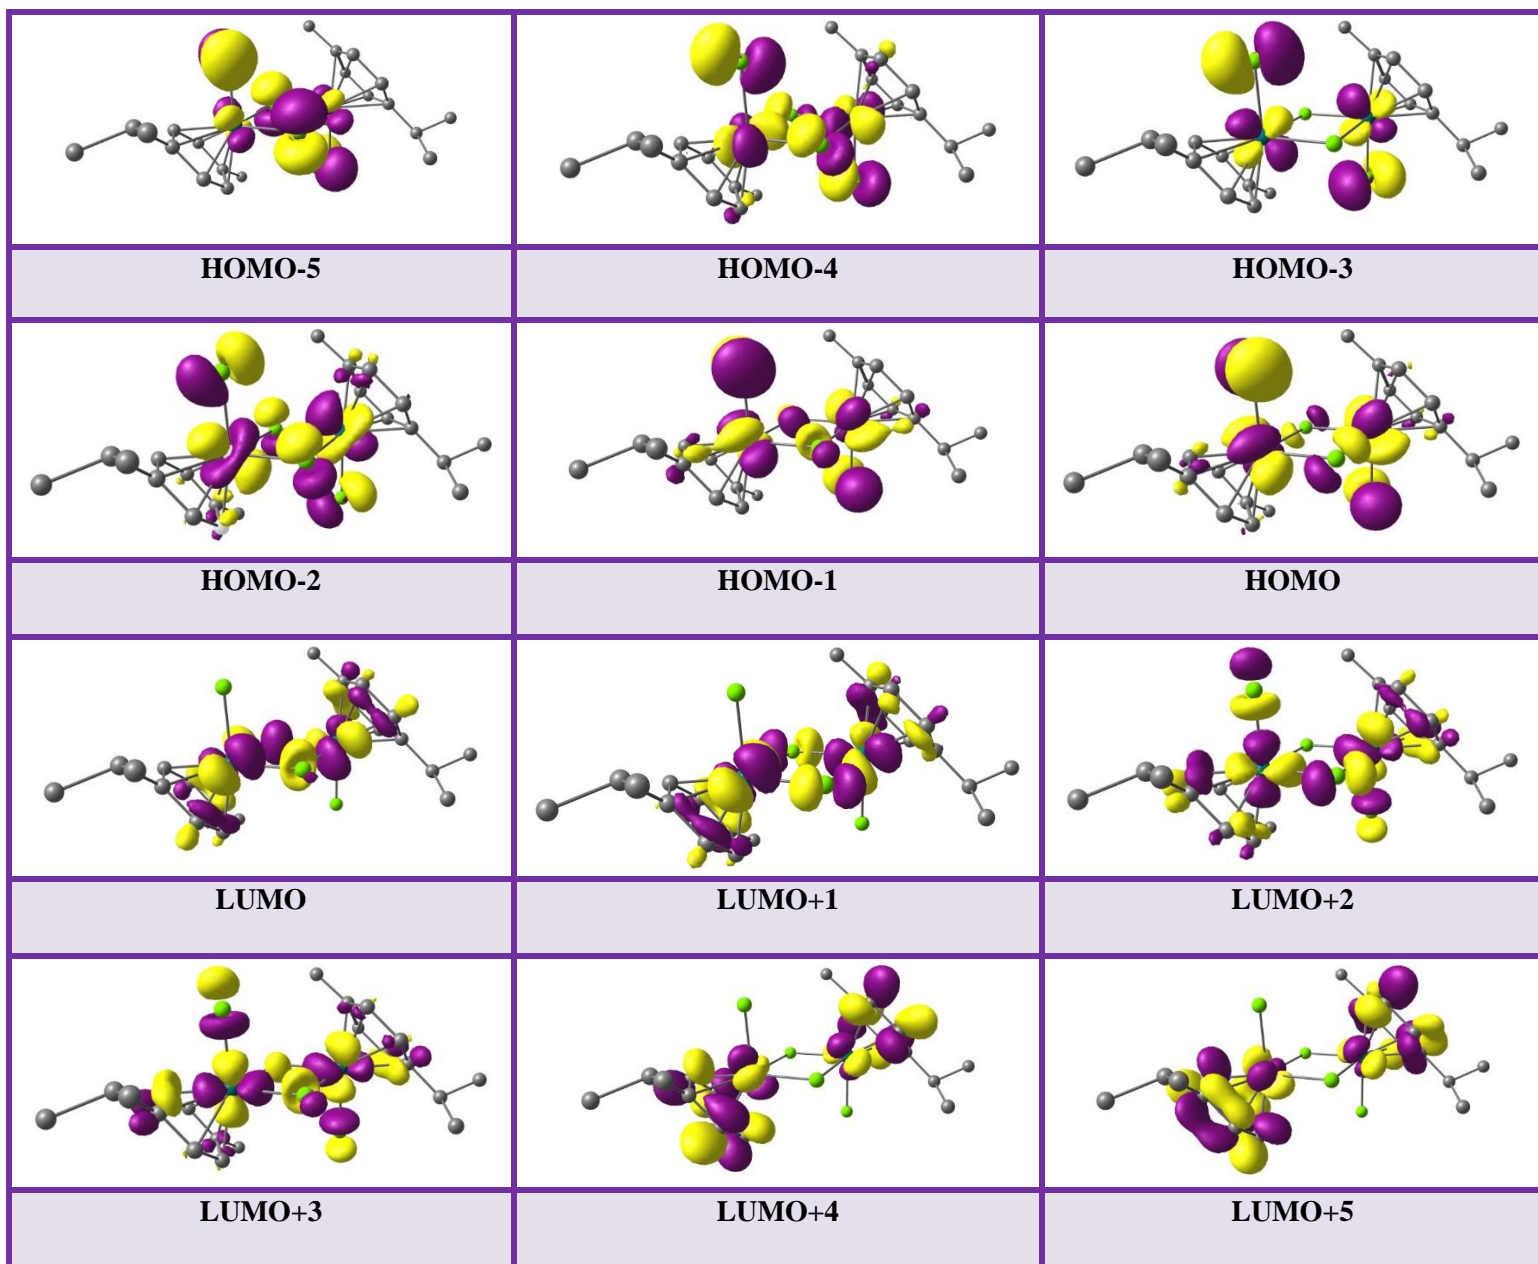

**Figure S10.** Molecular orbital plots for the optimized structure of **A** in gas phase.

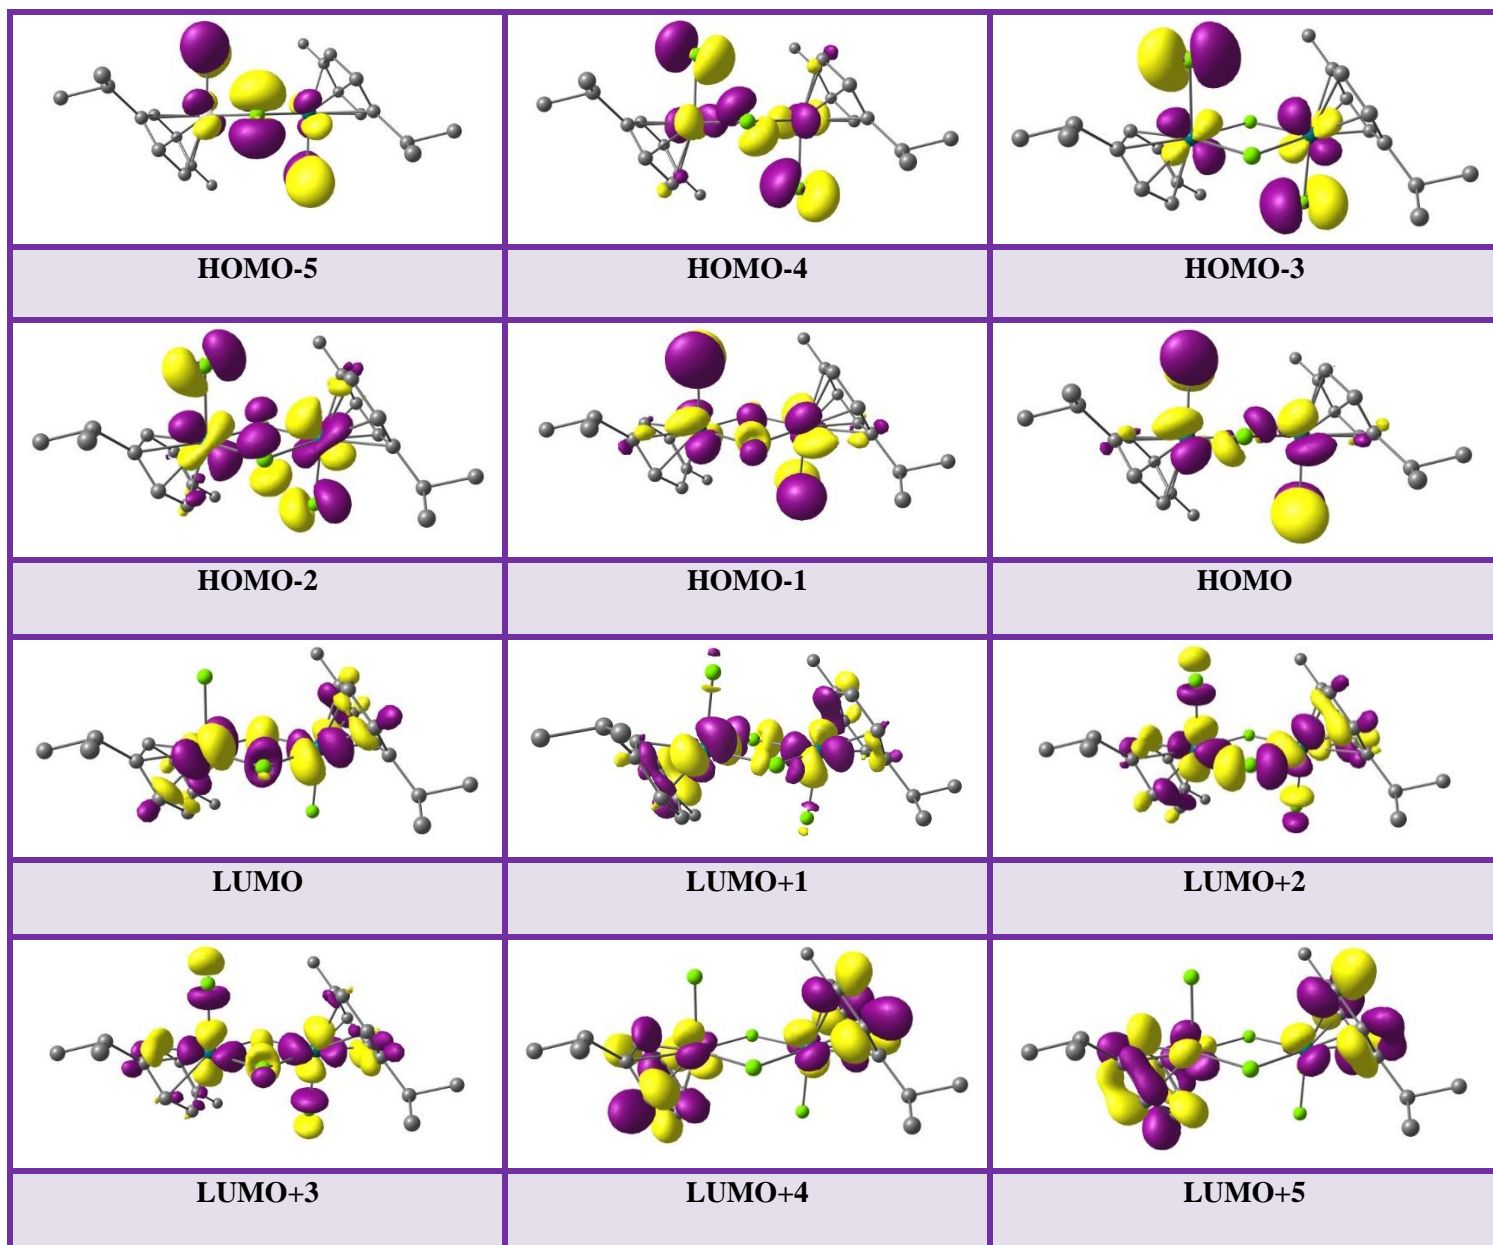

**Figure S11.** Molecular orbital plots for the optimized structure of **A** in dmsO solution.

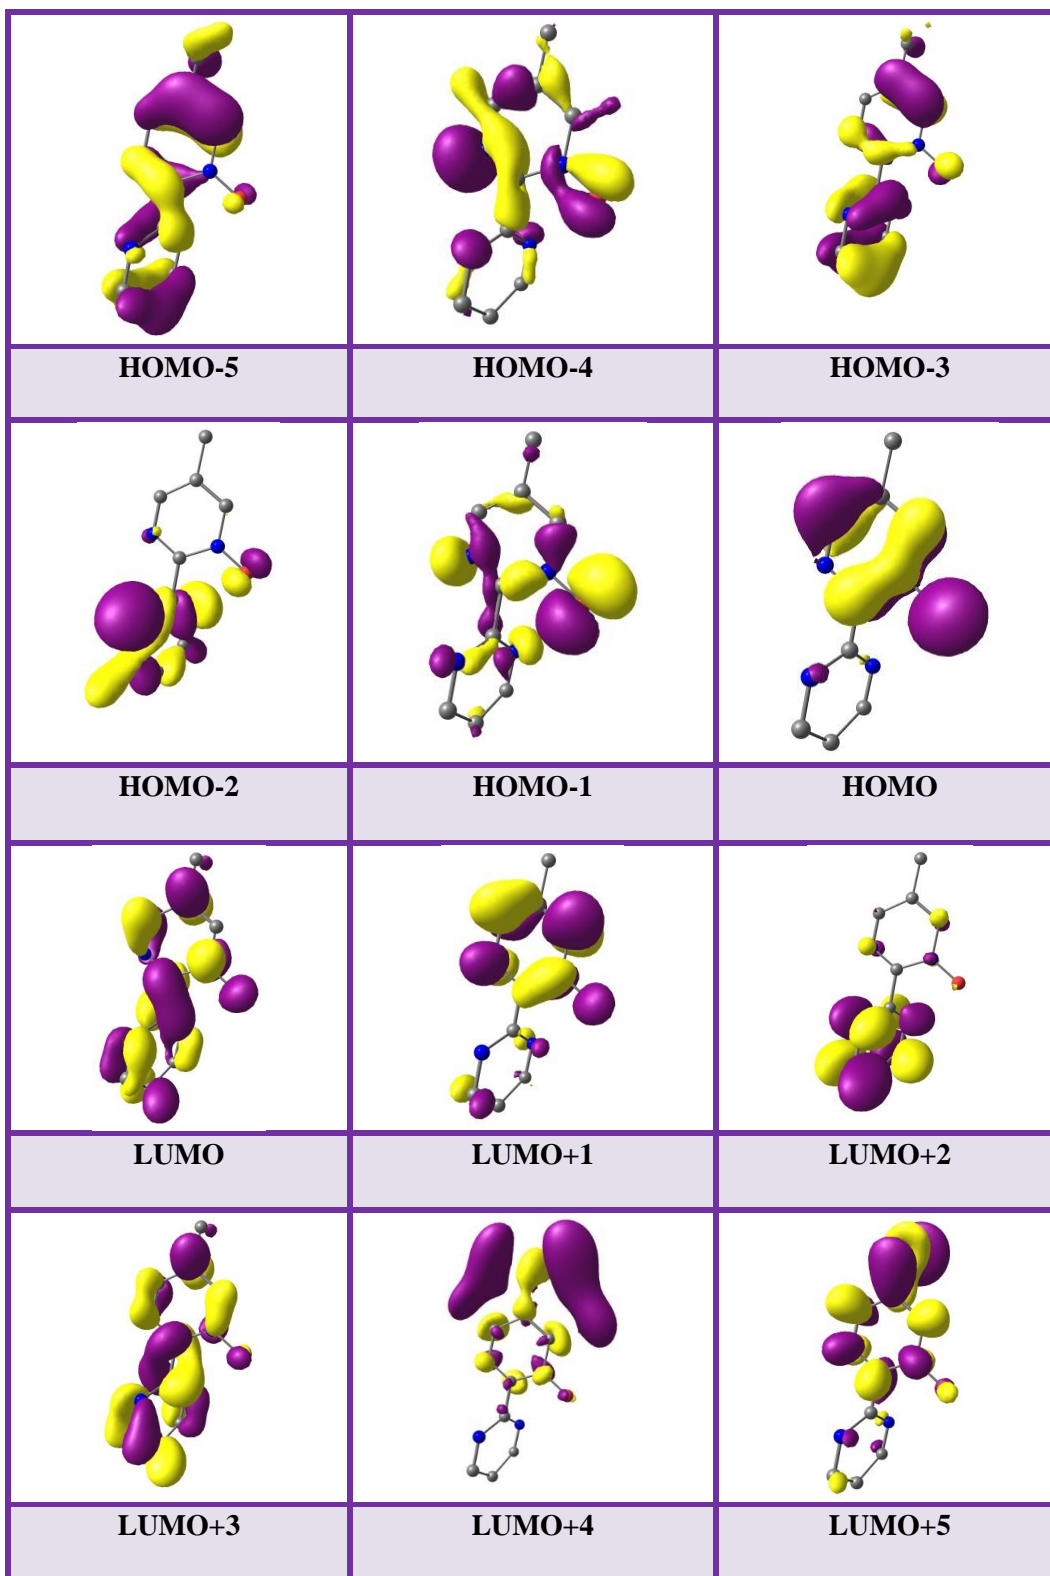

**Figure S12.** Molecular orbital plots for the optimized structure of **B** in gas phase.

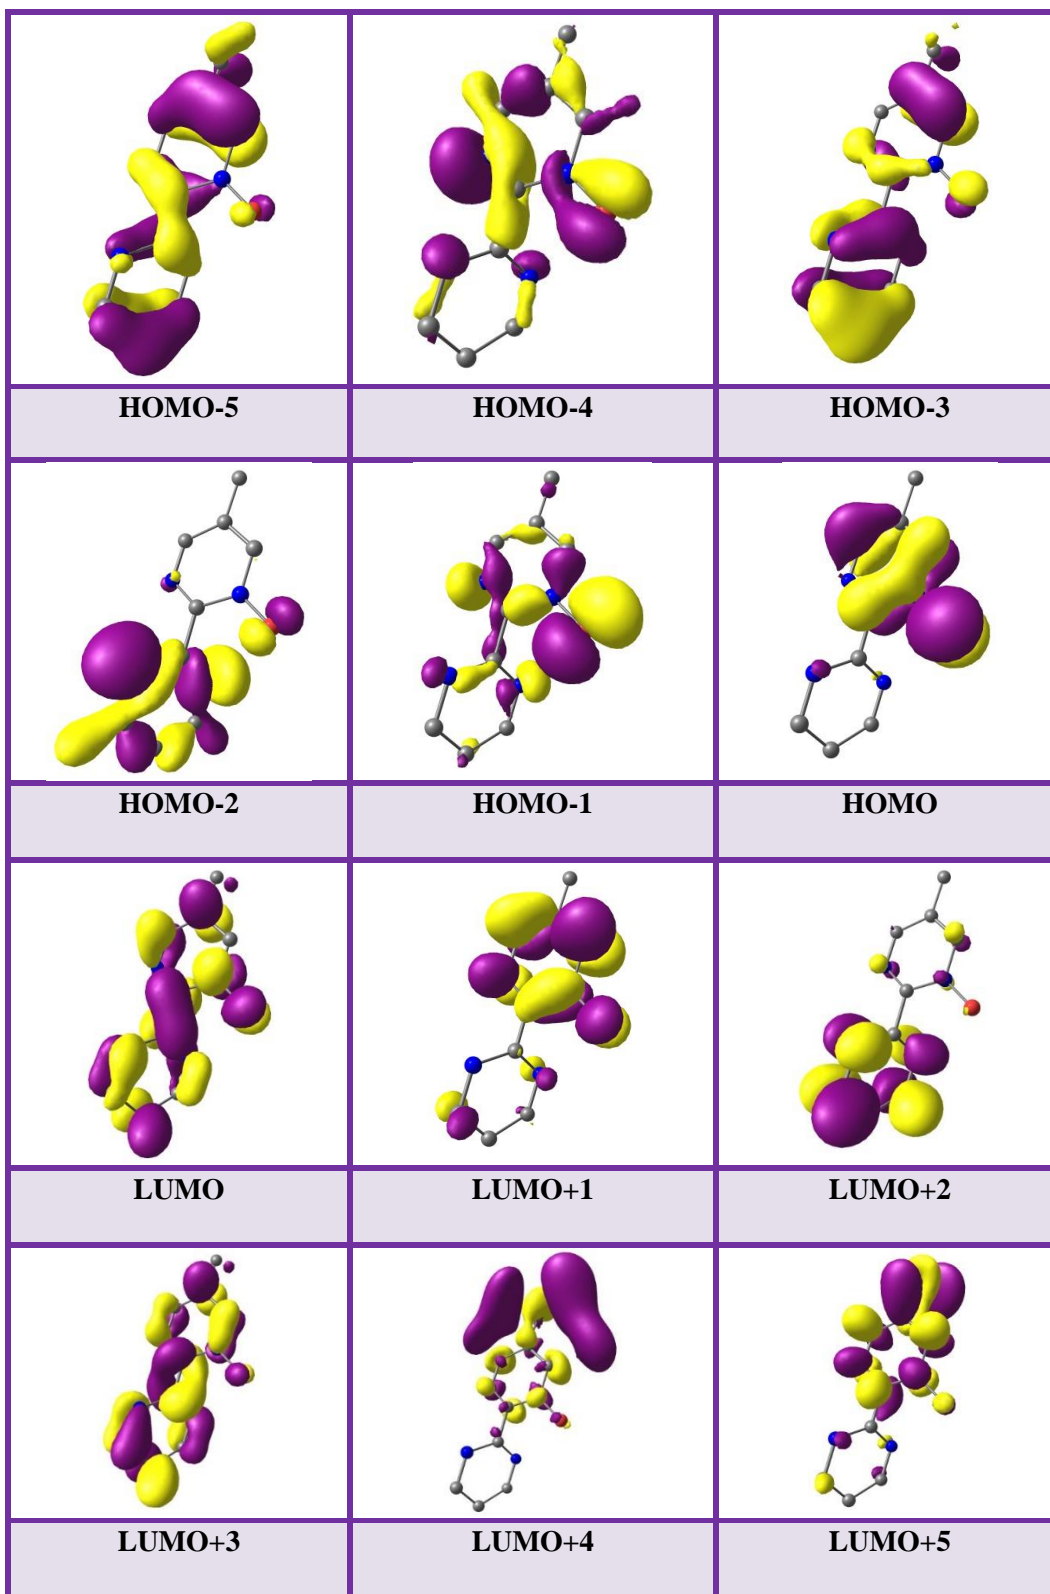

**Figure S13.** Molecular orbital plots for the optimized structure of **B** in dmsO solution.

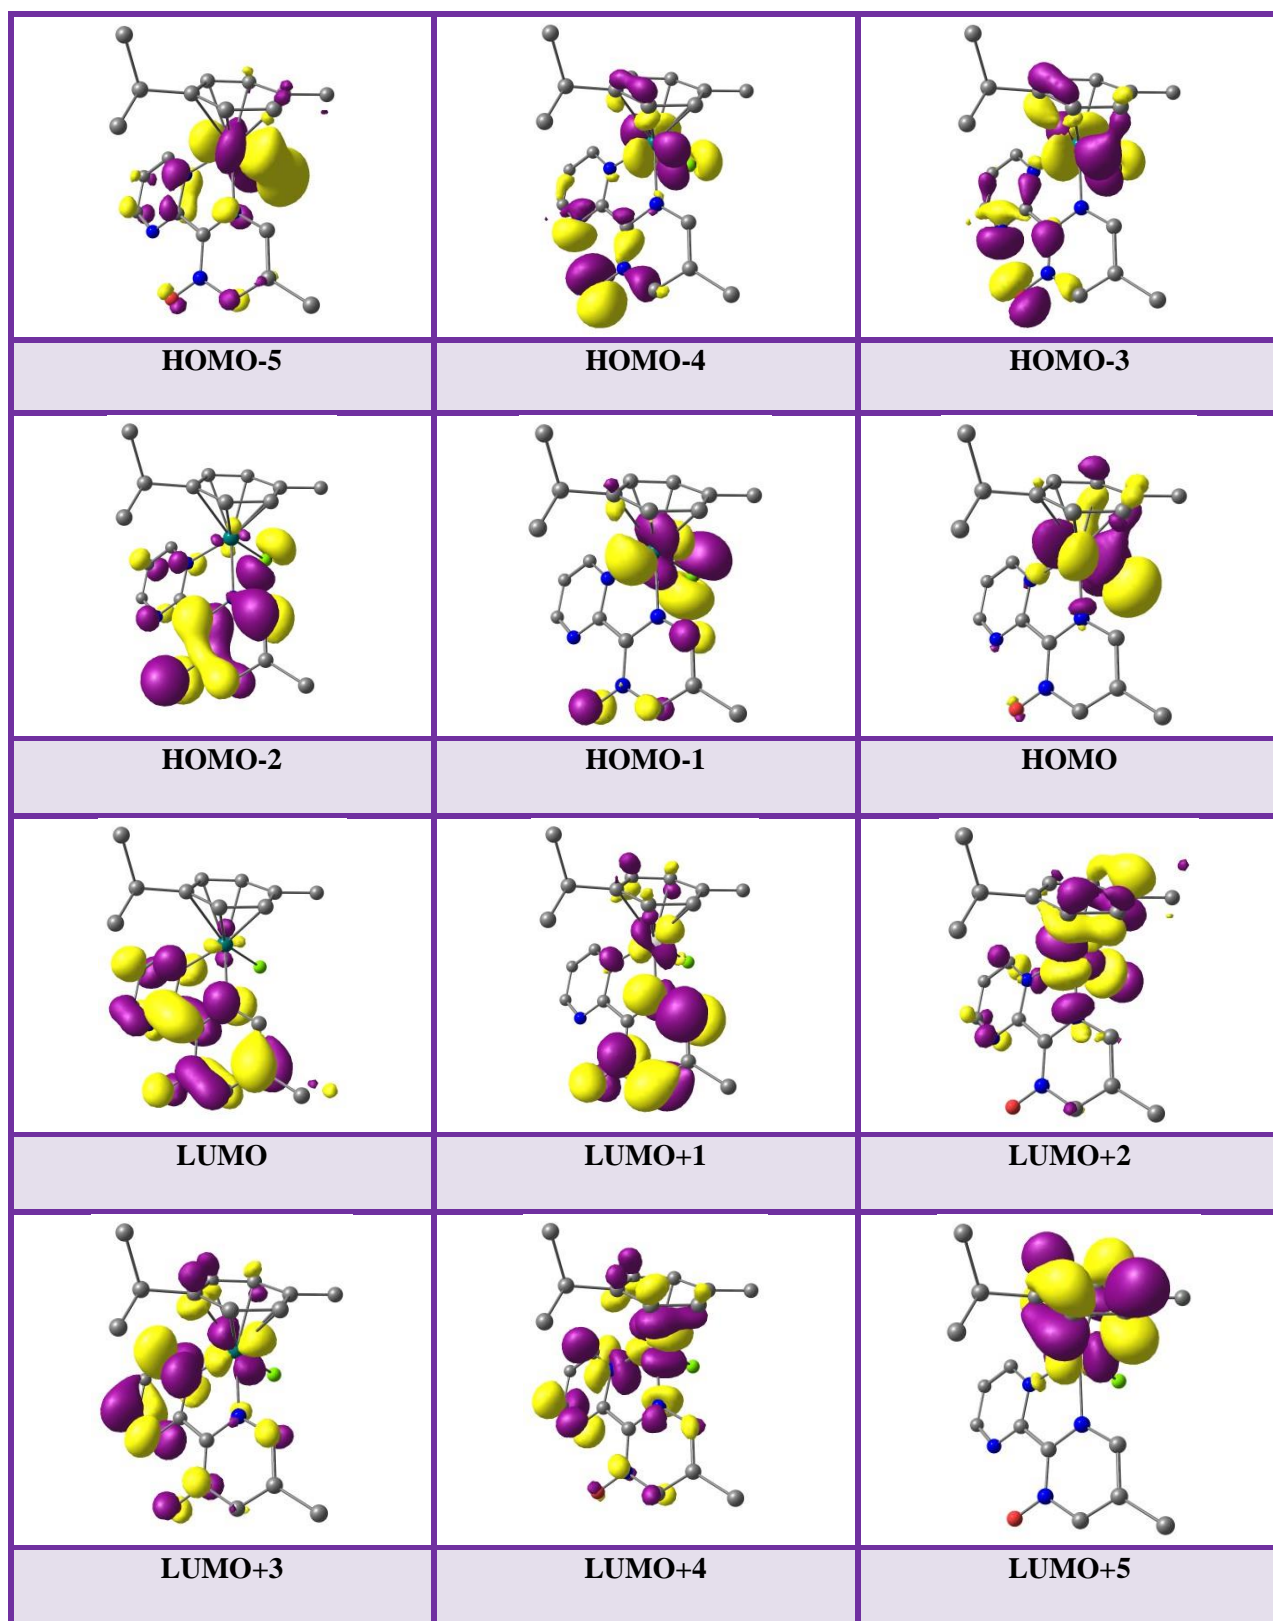

**Figure S14.** Molecular orbital plots for the optimized structure of **1** in gas phase.

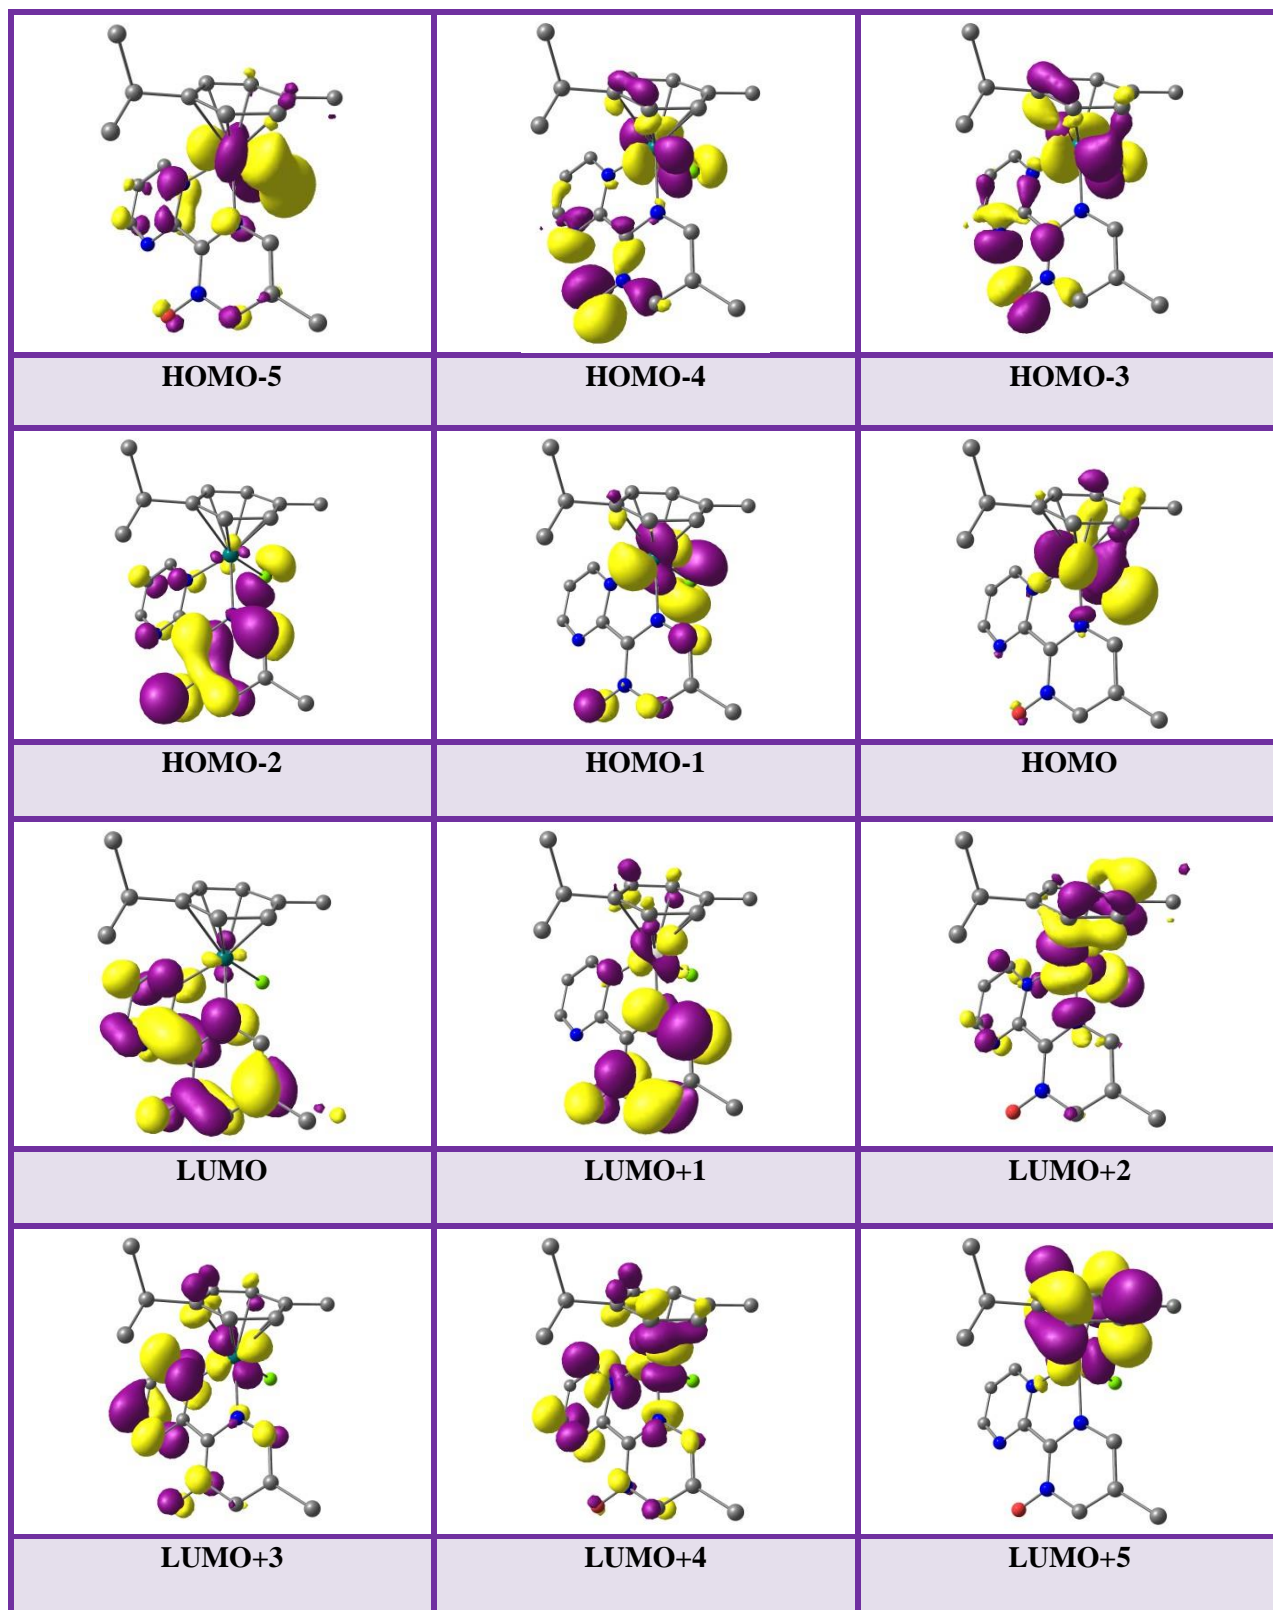

**Figure S15.** Molecular orbital plots for the optimized structure of **2** in dmsO solution.

**Table S3.** The energies of the selected molecular orbitals of **A** with their compositions in gas phase.

| A      |             |                 |                                                     |                                 |                                 |                                 |       |
|--------|-------------|-----------------|-----------------------------------------------------|---------------------------------|---------------------------------|---------------------------------|-------|
| MO     | Energy (eV) | Components(%)   |                                                     |                                 |                                 |                                 |       |
|        |             | Ru <sub>1</sub> | L <sub>1</sub> = <i>p</i> -cymene <sub>(7-30)</sub> | L <sub>2</sub> =Cl <sub>3</sub> | L <sub>3</sub> =Cl <sub>5</sub> | L <sub>4</sub> =Cl <sub>6</sub> | Other |
| LUMO+5 | -0.548      | 10              | 39                                                  | 0                               | 0                               | 1                               | 50    |
| LUMO+4 | -0.553      | 9               | 41                                                  | 1                               | 0                               | 0                               | 49    |
| LUMO+3 | -1.575      | 26              | 11                                                  | 7                               | 7                               | 4                               | 45    |
| LUMO+2 | -1.684      | 27              | 12                                                  | 7                               | 6                               | 2                               | 46    |
| LUMO+1 | -1.809      | 29              | 13                                                  | 1                               | 4                               | 11                              | 42    |
| LUMO   | -2.070      | 28              | 11                                                  | 1                               | 9                               | 11                              | 40    |
| HOMO   | -5.638      | 19              | 8                                                   | 18                              | 6                               | 4                               | 45    |
| HOMO-1 | -5.714      | 17              | 9                                                   | 19                              | 5                               | 5                               | 45    |
| HOMO-2 | -5.771      | 23              | 9                                                   | 12                              | 7                               | 7                               | 42    |
| HOMO-3 | -5.989      | 17              | 5                                                   | 27                              | 1                               | 0                               | 50    |
| HOMO-4 | -6.049      | 18              | 7                                                   | 18                              | 7                               | 8                               | 42    |
| HOMO-5 | -6.526      | 6               | 3                                                   | 18                              | 24                              | 22                              | 27    |

**Table S4.** The energies of the selected molecular orbitals of **A** with their compositions in dmsO solution.

| A      |             |                 |                                                     |                                 |                                 |                                 |       |
|--------|-------------|-----------------|-----------------------------------------------------|---------------------------------|---------------------------------|---------------------------------|-------|
| MO     | Energy (eV) | Components(%)   |                                                     |                                 |                                 |                                 |       |
|        |             | Ru <sub>1</sub> | L <sub>1</sub> = <i>p</i> -cymene <sub>(7-30)</sub> | L <sub>2</sub> =Cl <sub>3</sub> | L <sub>3</sub> =Cl <sub>5</sub> | L <sub>4</sub> =Cl <sub>6</sub> | Other |
| LUMO+5 | -0.551      | 10              | 40                                                  | 0                               | 0                               | 1                               | 49    |
| LUMO+4 | -0.584      | 9               | 40                                                  | 1                               | 0                               | 0                               | 50    |
| LUMO+3 | -1.669      | 27              | 11                                                  | 7                               | 6                               | 3                               | 46    |
| LUMO+2 | -1.759      | 28              | 12                                                  | 6                               | 9                               | 0                               | 45    |
| LUMO+1 | -1.878      | 28              | 12                                                  | 2                               | 3                               | 12                              | 43    |
| LUMO   | -2.167      | 29              | 10                                                  | 1                               | 9                               | 11                              | 40    |
| HOMO   | -5.606      | 18              | 8                                                   | 19                              | 5                               | 4                               | 46    |
| HOMO-1 | -5.693      | 16              | 8                                                   | 21                              | 5                               | 5                               | 45    |
| HOMO-2 | -5.730      | 22              | 8                                                   | 13                              | 7                               | 6                               | 44    |
| HOMO-3 | -5.944      | 17              | 4                                                   | 29                              | 0                               | 0                               | 50    |
| HOMO-4 | -6.045      | 12              | 7                                                   | 23                              | 9                               | 8                               | 41    |
| HOMO-5 | -6.444      | 8               | 3                                                   | 15                              | 24                              | 23                              | 27    |

**Table S5.** The energies of the selected molecular orbitals of **B** with their compositions in dmso solution.

| <b>B</b> |             |               |                |                |                |                |    |                      |                       |
|----------|-------------|---------------|----------------|----------------|----------------|----------------|----|----------------------|-----------------------|
| MO       | Energy (eV) | Components(%) |                |                |                |                |    |                      |                       |
|          |             | O             | N <sub>2</sub> | N <sub>3</sub> | N <sub>4</sub> | N <sub>5</sub> | Me | Ring <sub>6-11</sub> | Ring <sub>12-18</sub> |
| LUMO+5   | 2.762       | 0             | 4              | 3              | 1              | 1              | 67 | 20                   | 4                     |
| LUMO+4   | 2.506       | 0             | 1              | 1              | 0              | 0              | 60 | 36                   | 2                     |
| LUMO+3   | -0.479      | 1             | 3              | 5              | 4              | 4              | 4  | 34                   | 45                    |
| LUMO+2   | -1.066      | 1             | 2              | 1              | 18             | 21             | 0  | 4                    | 53                    |
| LUMO+1   | -1.303      | 7             | 21             | 14             | 2              | 1              | 3  | 46                   | 6                     |
| LUMO     | -1.355      | 6             | 3              | 13             | 7              | 6              | 3  | 33                   | 29                    |
| HOMO     | -5.938      | 52            | 0              | 3              | 1              | 1              | 1  | 40                   | 2                     |
| HOMO-1   | -6.576      | 54            | 12             | 2              | 5              | 2              | 2  | 17                   | 6                     |
| HOMO-2   | -6.898      | 4             | 2              | 0              | 32             | 35             | 0  | 2                    | 25                    |
| HOMO-3   | -7.730      | 3             | 8              | 1              | 5              | 5              | 4  | 27                   | 47                    |
| HOMO-4   | -7.892      | 14            | 44             | 6              | 2              | 2              | 2  | 25                   | 5                     |
| HOMO-5   | -8.114      | 2             | 6              | 1              | 2              | 3              | 6  | 48                   | 32                    |

**Table S6.** The energies of the selected molecular orbitals of **1** with their compositions in gas phase.

| <b>1</b> |             |               |       |                  |    |
|----------|-------------|---------------|-------|------------------|----|
| MO       | Energy (eV) | Components(%) |       |                  |    |
|          |             | Ru            | bpyNO | <i>p</i> -cymene | Cl |
| LUMO+5   | -3.943      | 19            | 6     | 73               | 2  |
| LUMO+4   | -4.652      | 35            | 50    | 15               | 0  |
| LUMO+3   | -4.887      | 22            | 65    | 12               | 1  |
| LUMO+2   | -4.966      | 43            | 19    | 24               | 14 |
| LUMO+1   | -5.076      | 10            | 79    | 9                | 2  |
| LUMO     | -5.747      | 3             | 92    | 3                | 2  |
| HOMO     | -9.052      | 37            | 7     | 14               | 42 |
| HOMO-1   | -9.272      | 39            | 8     | 13               | 40 |
| HOMO-2   | -9.581      | 3             | 79    | 1                | 17 |
| HOMO-3   | -9.953      | 31            | 47    | 11               | 11 |
| HOMO-4   | -10.006     | 18            | 63    | 8                | 11 |
| HOMO-5   | -10.520     | 33            | 17    | 8                | 42 |



**Table S7.** The energies of the selected molecular orbitals of **1** with their compositions in dmsO solution.

| <b>1</b> |             |               |       |                  |    |
|----------|-------------|---------------|-------|------------------|----|
| MO       | Energy (eV) | Components(%) |       |                  |    |
|          |             | Ru            | bpyNO | <i>p</i> -cymene | Cl |
| LUMO+5   | -1.008      | 17            | 5     | 76               | 2  |
| LUMO+4   | -1.827      | 41            | 42    | 17               | 0  |
| LUMO+3   | -2.091      | 17            | 72    | 10               | 1  |
| LUMO+2   | -2.207      | 41            | 28    | 19               | 12 |
| LUMO+1   | -2.313      | 15            | 69    | 10               | 6  |
| LUMO     | -2.993      | 4             | 92    | 2                | 2  |
| HOMO     | -6.475      | 50            | 8     | 15               | 27 |
| HOMO-1   | -6.667      | 46            | 24    | 11               | 19 |
| HOMO-2   | 6.991       | 13            | 71    | 3                | 13 |
| HOMO-3   | -7.261      | 56            | 12    | 13               | 19 |
| HOMO-4   | -7.427      | 5             | 91    | 2                | 2  |
| HOMO-5   | -7.976      | 36            | 17    | 10               | 37 |

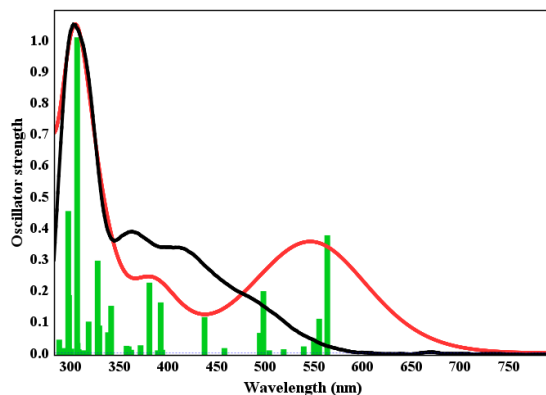

**Figure S16.** TD-DFT calculated (Red line) and experimental (Black line) UV-vis spectra of **A** in dmsO obtained with the mixed basis set 6-31(g)d/LanL2DZ and the functional B3LYP.

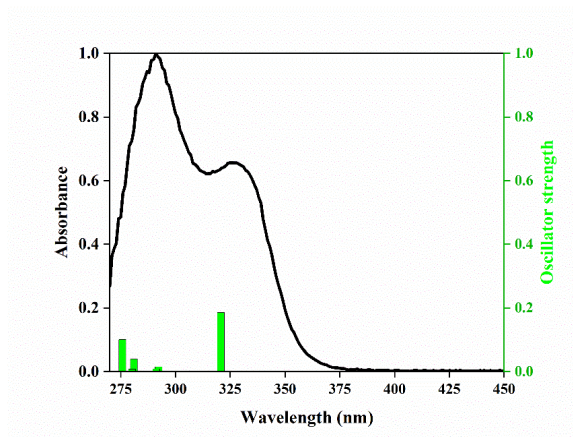

**Figure S17.** TD-DFT calculated (Green bars) and experimental (Black line) UV-vis spectra of **B** in dmsO obtained with the mixed basis set 6-31(g)d/LanL2DZ and the functional B3LYP.

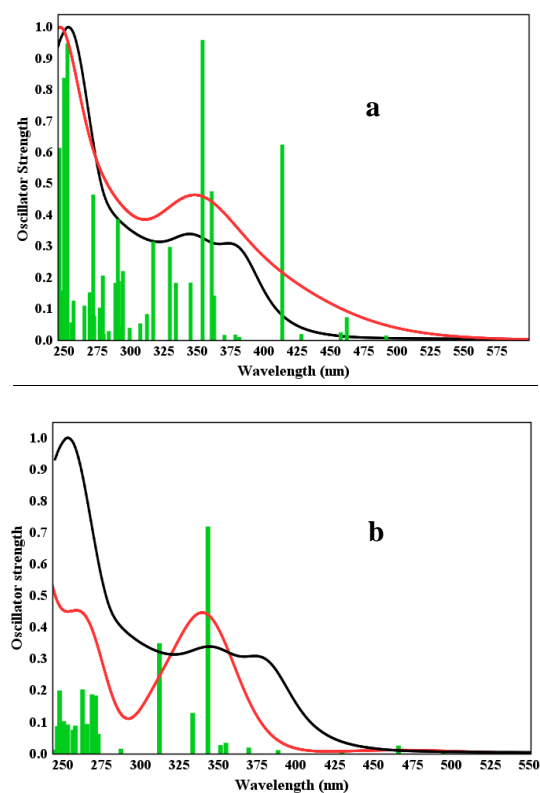

**Figure S18.** TD-DFT calculated (Red line) and experimental (Black line) UV-vis spectra of **1** in dmsO obtained with the mixed basis set 6-31(g)d/LanL2DZ and the functionals B3LYP (a), WB97XD (b).

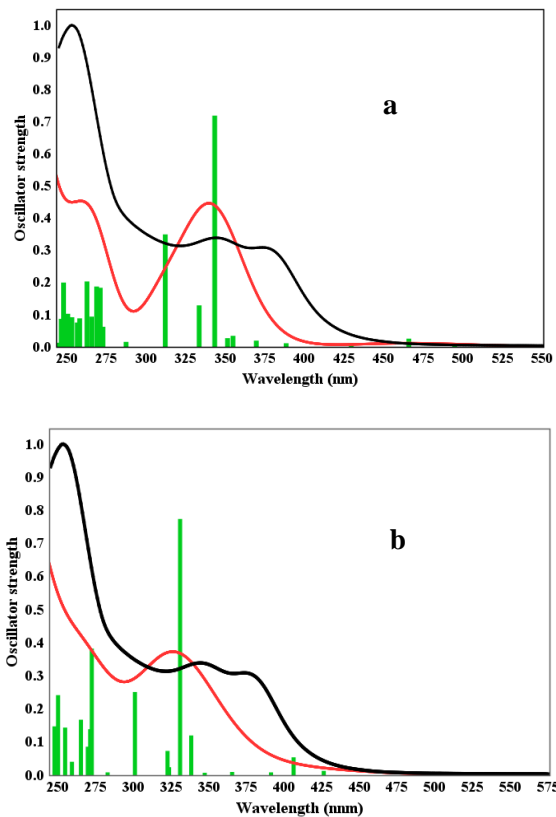

**Figure S19.** TD-DFT calculated (Red lines) and experimental (Black lines) UV-vis spectra of **1** in dmsO obtained with the functional WB97XD and the mixed basis sets 6-31(g)d/LanL2DZ (a), Def2TZVP /LanL2DZ (b).

**Table S8.** Wavelengths and the nature of transitions for **1** in dmsO solution where M = Ru, L<sub>1</sub>= bpyNO, L<sub>2</sub> = *p*-cymene and L<sub>3</sub> = Cl.

| Exited State             | Oscillator Strength | Calculated $\lambda$ (nm) | Transitions (Percentage Major Contribution)                                                                 |
|--------------------------|---------------------|---------------------------|-------------------------------------------------------------------------------------------------------------|
| $S_0 \rightarrow S_1$    | 0.0009              | 491.3                     | HOMO->LUMO (25%), HOMO->L+1 (19%), HOMO->L+2 (40%)                                                          |
| $S_0 \rightarrow S_2$    | 0.0071              | 461.7                     | H-1->L+1 (17%), H-1->L+2 (38%), HOMO->LUMO (11%)                                                            |
| $S_0 \rightarrow S_3$    | 0.0020              | 457.2                     | HOMO->LUMO (60%), HOMO->L+2 (13%)                                                                           |
| $S_0 \rightarrow S_5$    | 0.0655              | 413.3                     | H-1->LUMO (75%), H-2->LUMO (3%), H-1->L+2 (8%), HOMO->L+1 (2%)                                              |
| $S_0 \rightarrow S_{10}$ | 0.0504              | 311.2                     | H-4->LUMO (12%), H-2->LUMO (37%), HOMO->L+1 (18%), HOMO->L+2 (10%)                                          |
| $S_0 \rightarrow S_{11}$ | 0.1009              | 353.5                     | H-2->LUMO (31%), HOMO->L+1 (36%)                                                                            |
| $S_0 \rightarrow S_{14}$ | 0.0319              | 278.7                     | H-1->L+1 (53%), H-1->L+2 (12%), H-1->L+3 (12%), H-2->L+1 (8%), H-2->L+2 (3%), H-1->L+4 (5%)                 |
| $S_0 \rightarrow S_{15}$ | 0.0327              | 316.5                     | H-1->L+3 (51%), H-1->L+4 (33%), H-5->LUMO (3%), H-1->L+2 (7%)                                               |
| $S_0 \rightarrow S_{19}$ | 0.0227              | 293.8                     | H-5->LUMO (25%), H-3->L+1 (25%), H-3->L+2 (9%), H-3->L+3 (2%), H-2->L+1 (4%), H-2->L+2 (5%), HOMO->L+5 (8%) |
| $S_0 \rightarrow S_{22}$ | 0.0403              | 290.0                     | H-5->LUMO (19%), H-4->L+3 (10%)                                                                             |
| $S_0 \rightarrow S_{29}$ | 0.0486              | 271.5                     | H-5->LUMO (25%), H-3->L+1 (25%), H-3->L+2 (9%), H-3->L+3 (2%), H-2->L+1 (4%), H-2->L+2 (5%), HOMO->L+5 (8%) |

**Table S9.** Crystallographic and structure refinement data for **1**.

|                                   | <b>1</b>                                                                                          |
|-----------------------------------|---------------------------------------------------------------------------------------------------|
| Empirical formula                 | C <sub>19</sub> H <sub>22</sub> Cl <sub>2</sub> N <sub>4</sub> ORu                                |
| Formula weight                    | 494.37                                                                                            |
| Temperature                       | 100(2) K                                                                                          |
| Wavelength                        | 0.71073 Å                                                                                         |
| Crystal system, space group       | Monoclinic P21/n                                                                                  |
| Unit cell dimensions              | a = 11.9611(6) Å<br>b = 13.8587(6) Å<br>c = 11.9663(6) Å<br>α = 90°<br>β = 102.052(2)°<br>γ = 90° |
| Volume                            | 1939.88(16) Å <sup>3</sup>                                                                        |
| Z, Calculated density             | 1.693 Mg/m <sup>3</sup>                                                                           |
| Absorption coefficient            | 1.101 mm <sup>-1</sup>                                                                            |
| F(000)                            | 1000                                                                                              |
| Crystal size                      | 0.022 x 0.220 x 0.272                                                                             |
| Theta range for data collection   | 2.278 to 27.180°                                                                                  |
| Reflections collected / unique    | 21686                                                                                             |
| Absorption correction             | semi-empirical from equivalents                                                                   |
| Data / restraints / parameters    | 4305 / 0 / 244                                                                                    |
| Goodness-of-fit on F <sup>2</sup> | 1.005                                                                                             |
| Final R indices [I > 2σ(I)]       | R1 = 0.0266, wR2 = 0.0641                                                                         |
| R indices (all data)              | R1 = 0.0339, wR2 = 0.0598                                                                         |

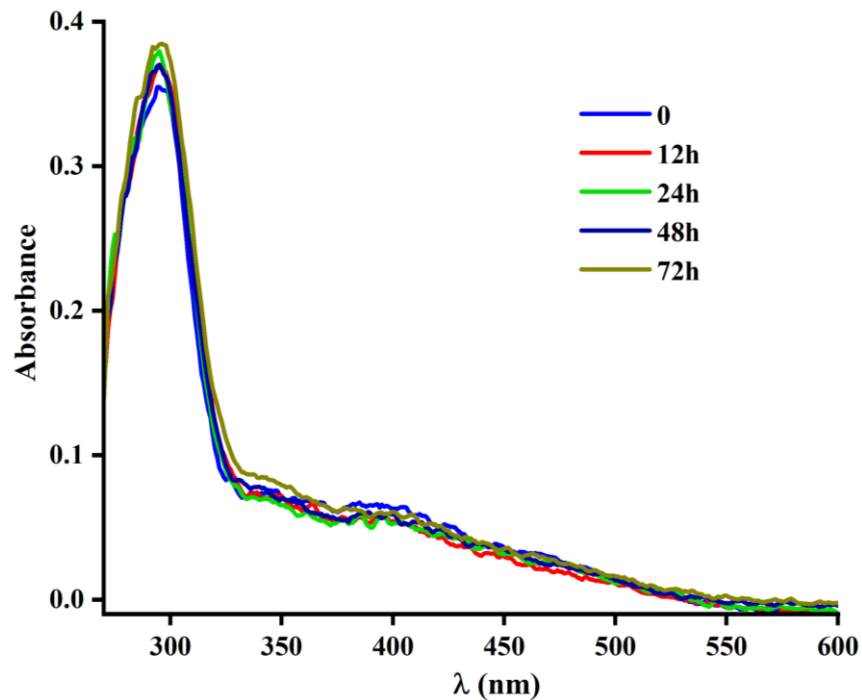

**Figure S20.** Time course UV-vis spectra of **A** ( $5 \times 10^{-5}$  M) dissolved in dmsol. The spectra were recorded over 72 hours at room temperature.

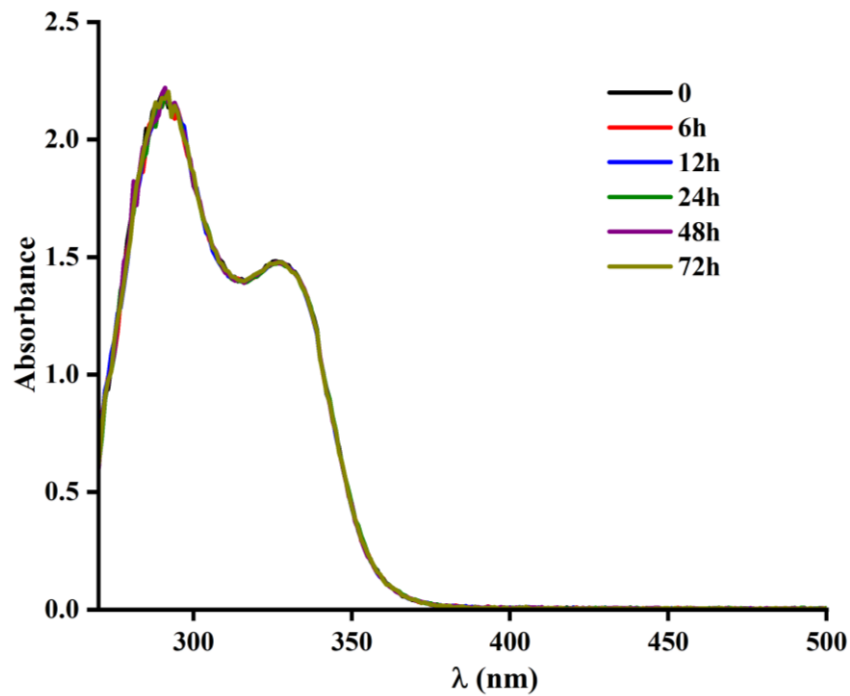

**Figure S21.** Time course UV-vis spectra of **B** ( $5 \times 10^{-5}$  M) dissolved in dmsol. The spectra were recorded over 72 hours at room temperature.

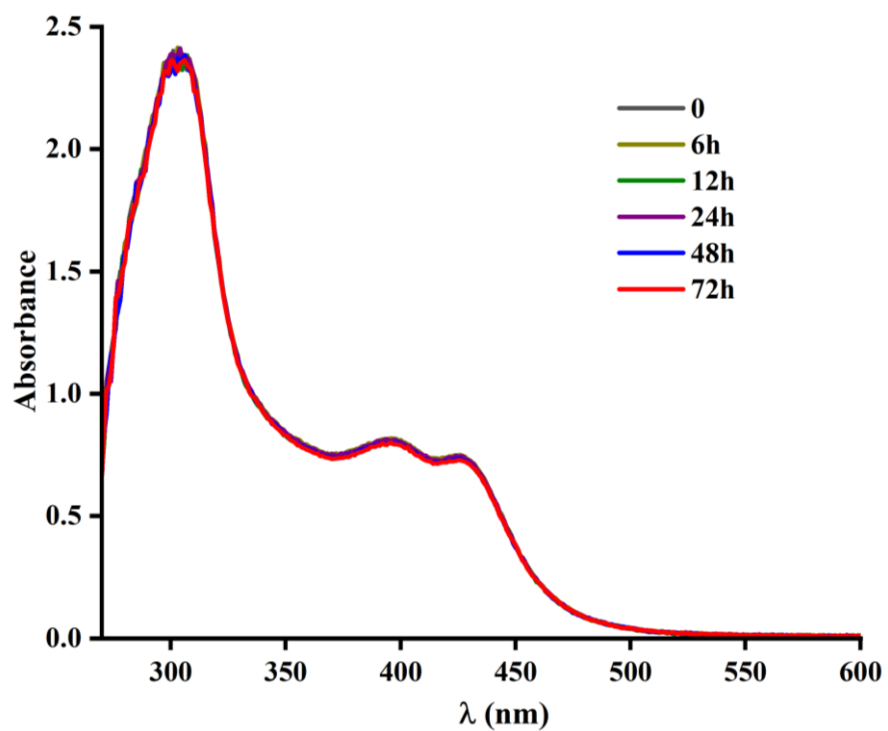

**Figure S22.** Time course UV-vis spectra of **1** ( $5 \times 10^{-5}$  M) dissolved in dmsolvent. The spectra were recorded over 72 hours at room temperature.

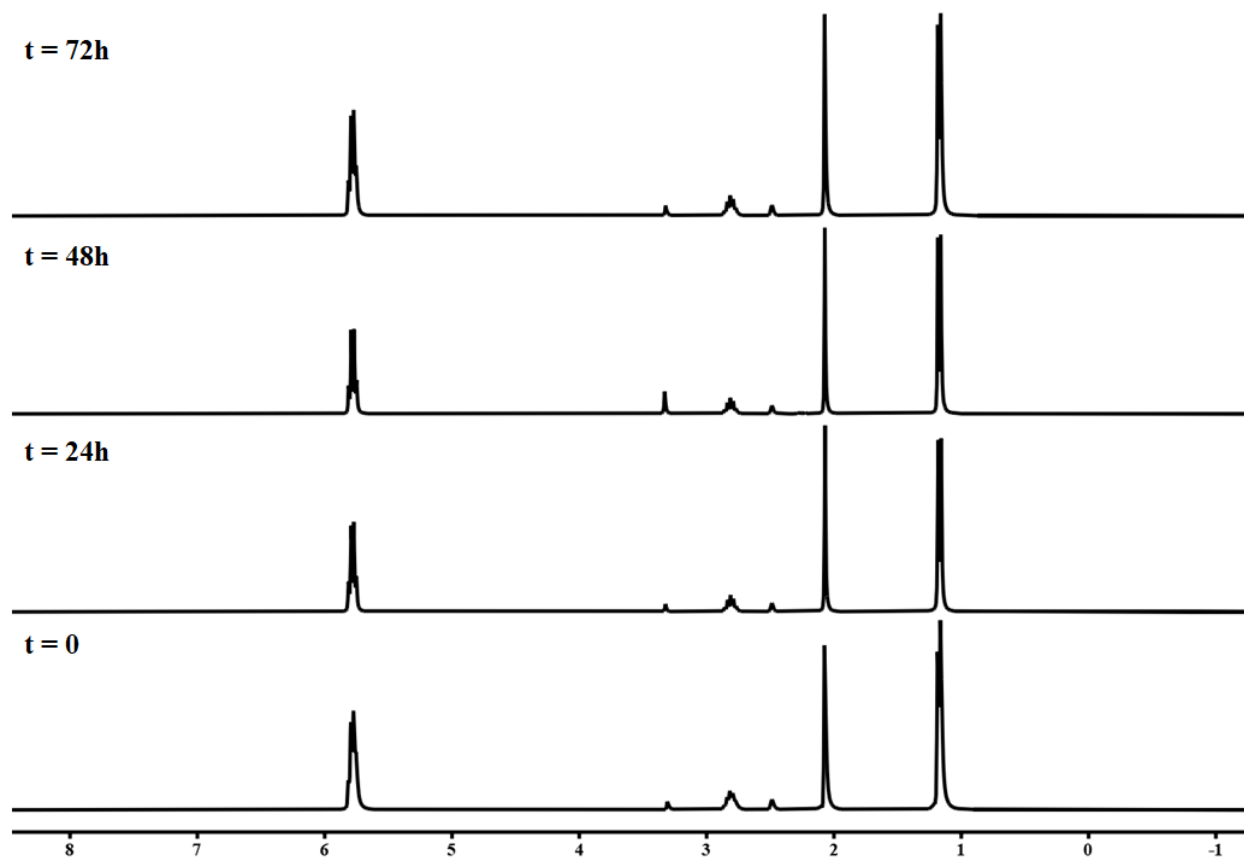

**Figure S23.** Time course  $^1\text{H}$  NMR spectrum of **A** in  $\text{dms0-d}_6$  at room temperature.



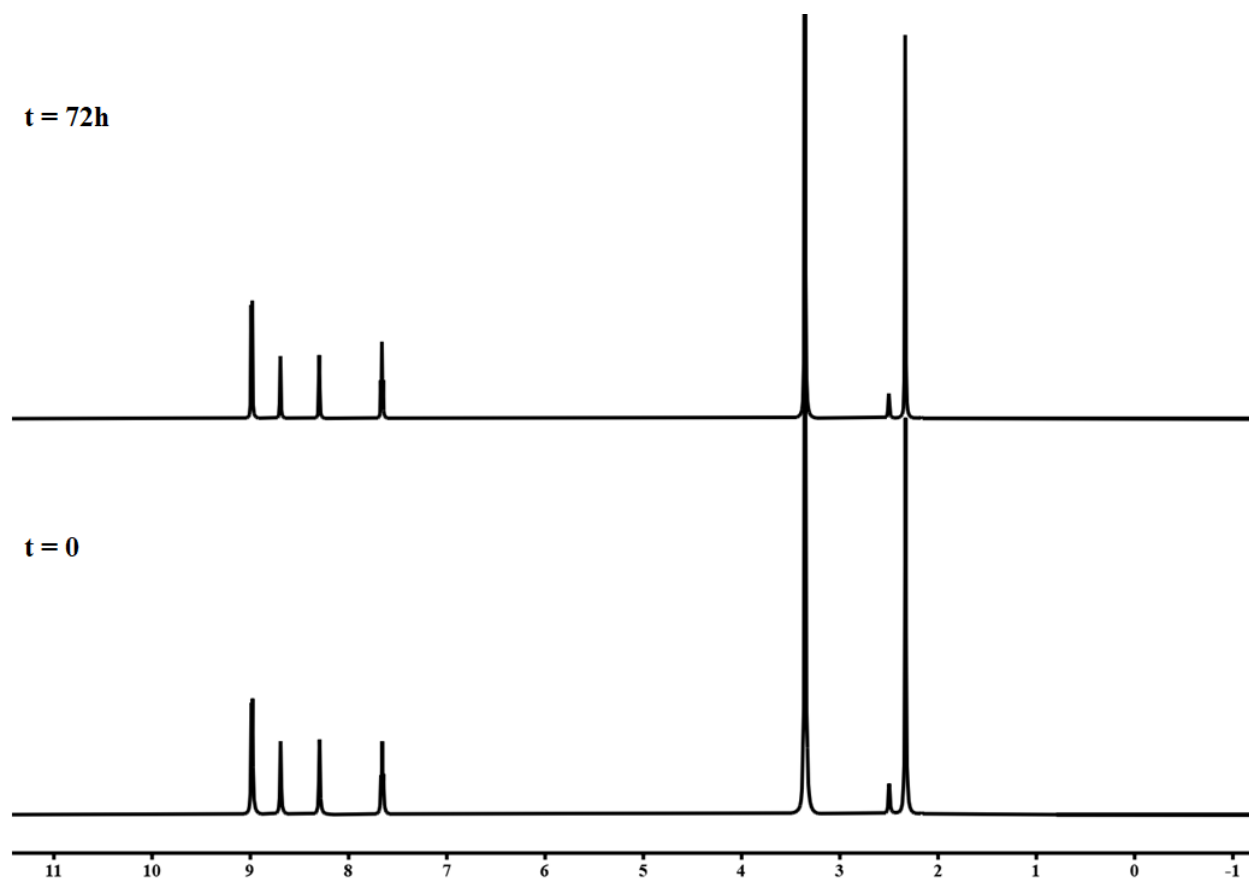

**Figure S24.** Time course  $^1\text{H}$  NMR spectrum of **B** in  $\text{dmsO-}d_6$  at room temperature.

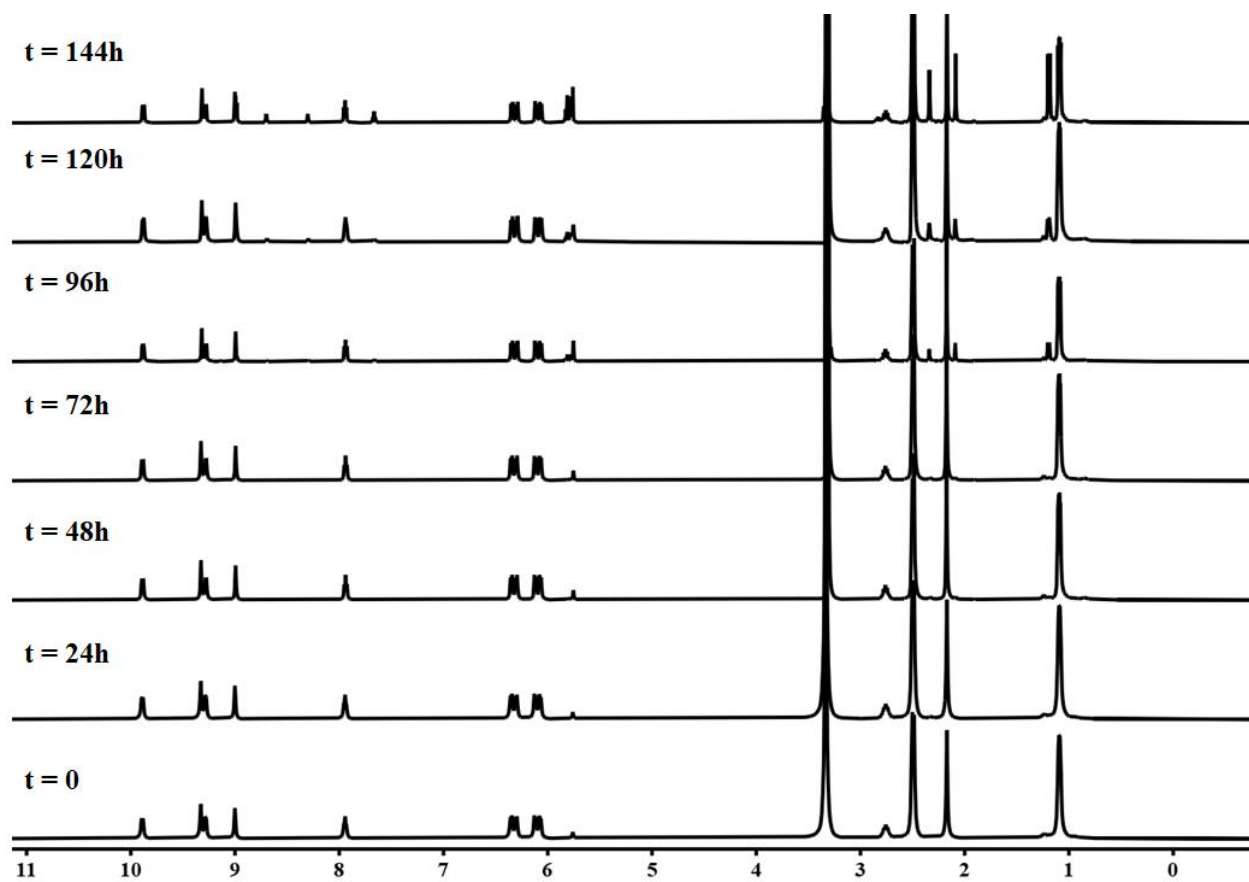

**Figure S25.** Time course  $^1\text{H}$  NMR spectrum of **1** in  $\text{dmsO-}d_6$  at room temperature.

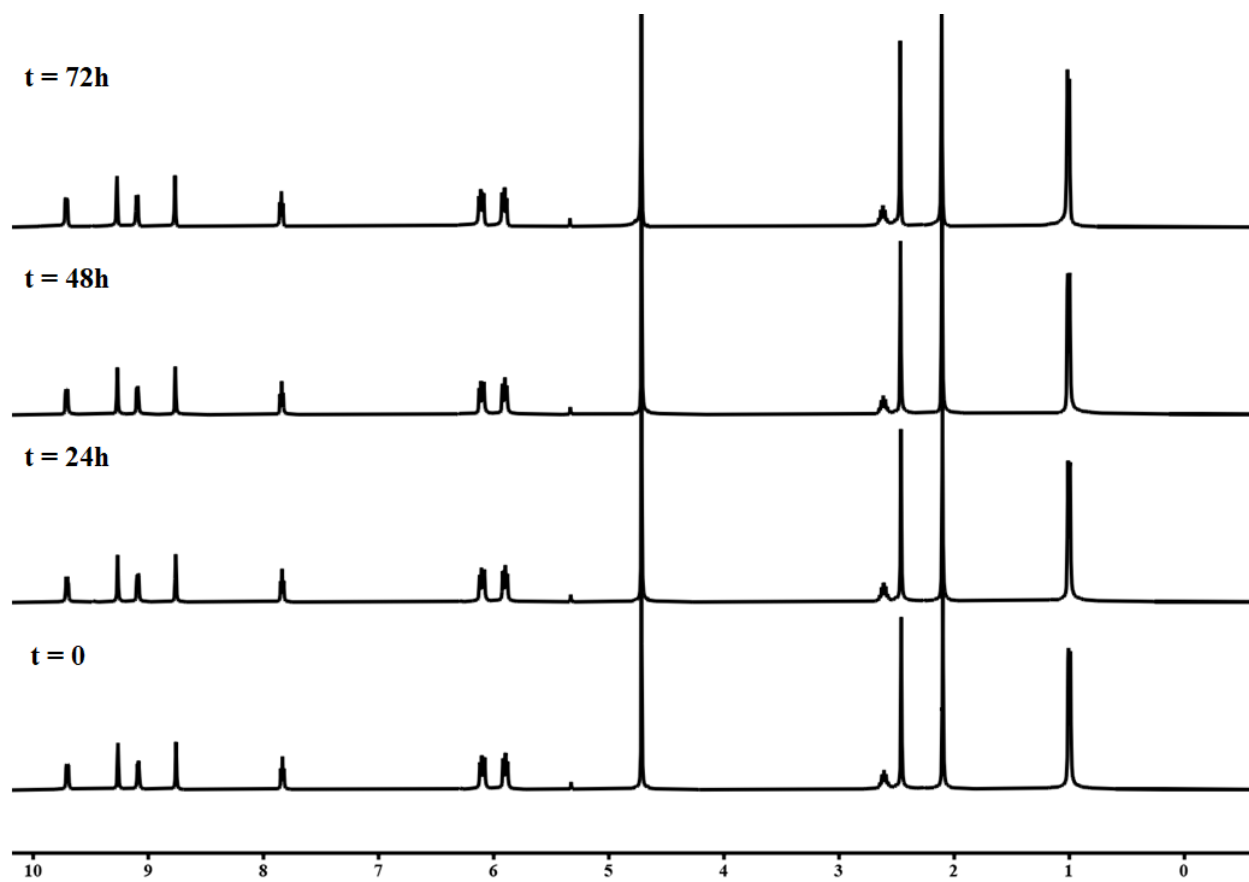

**Figure S26.** Time course  $^1\text{H}$  NMR spectrum of **1** in  $\text{D}_2\text{O}$  at room temperature.

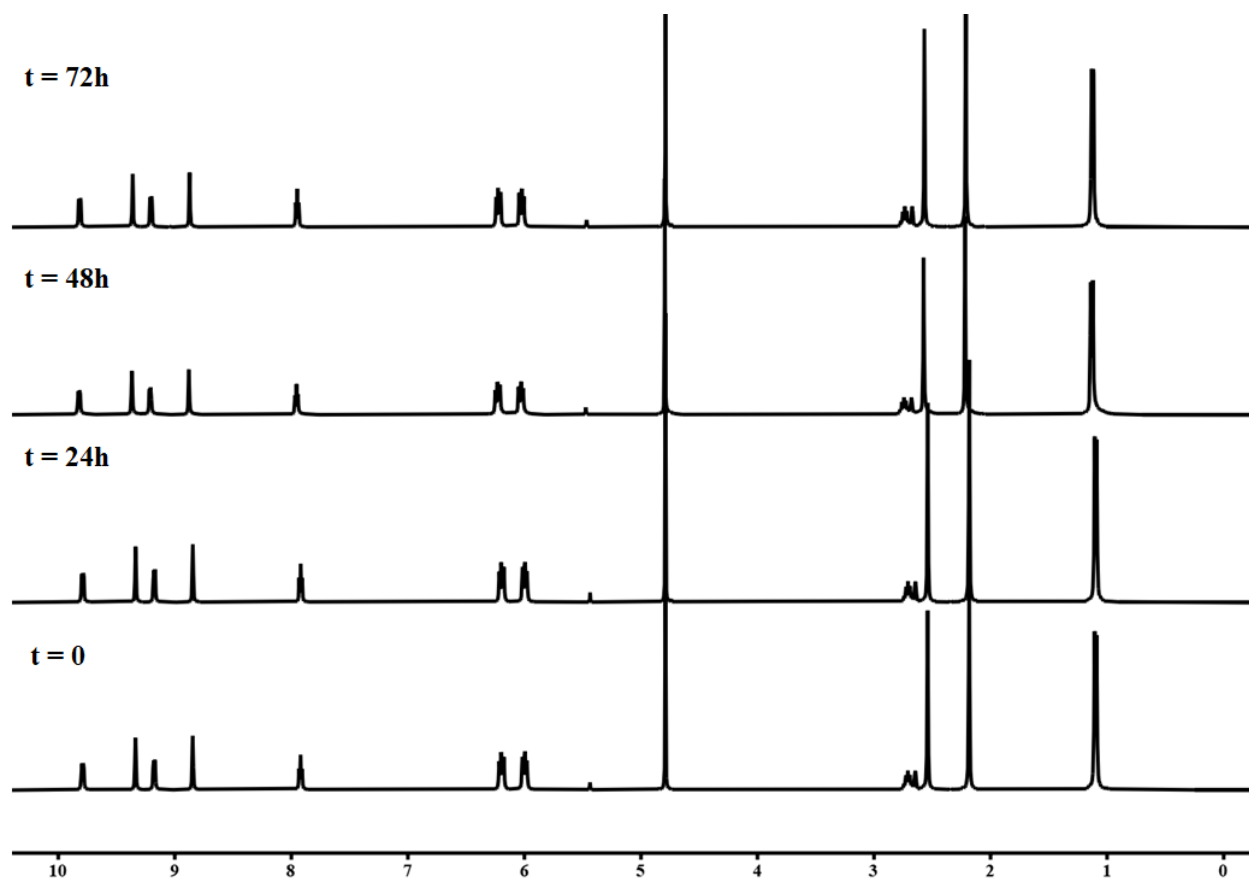

**Figure S27.** Time course  $^1\text{H}$  NMR spectrum of **1** in a mixture of  $\text{dms0-d}_6/\text{D}_2\text{O}$  at room temperature.

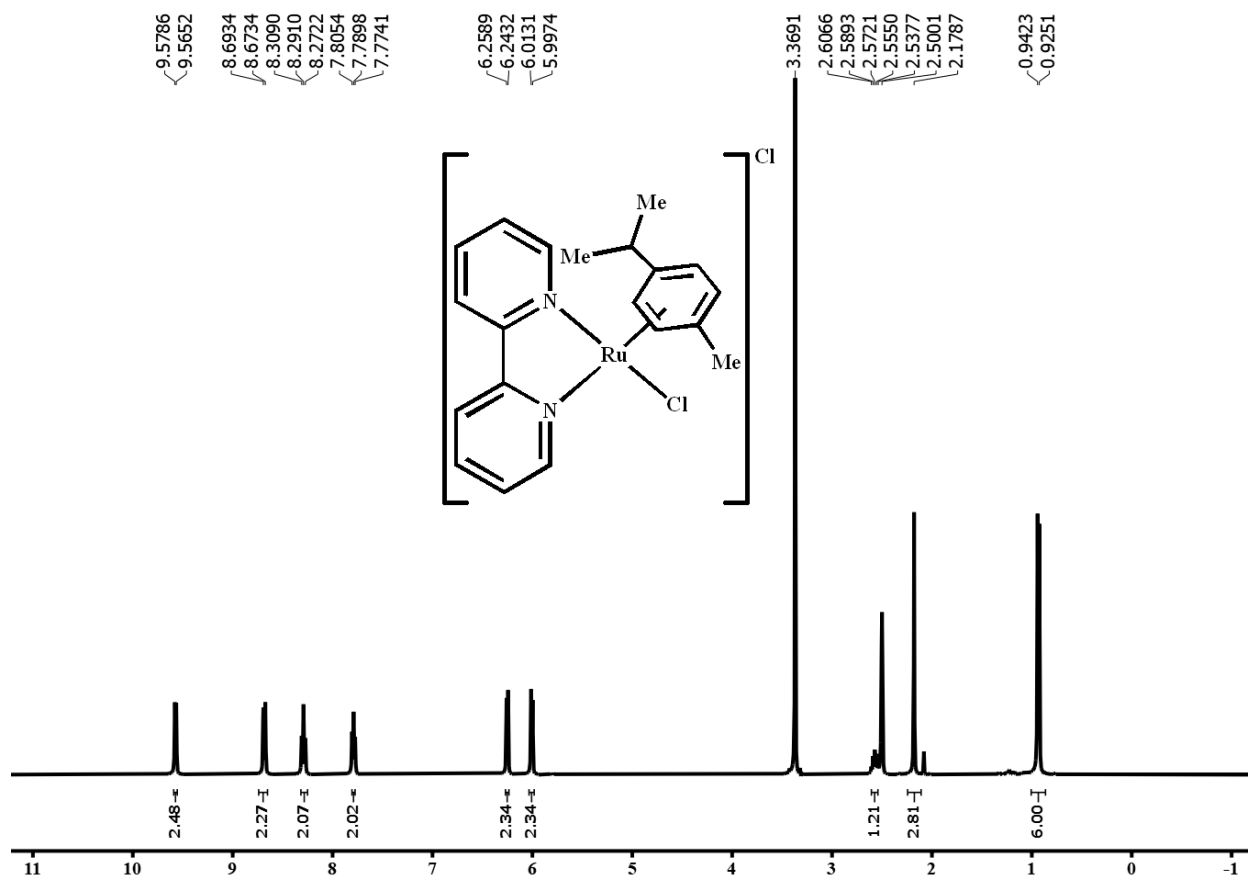

Figure S28. <sup>1</sup>H NMR spectrum of 2 in dms0-d<sub>6</sub>.

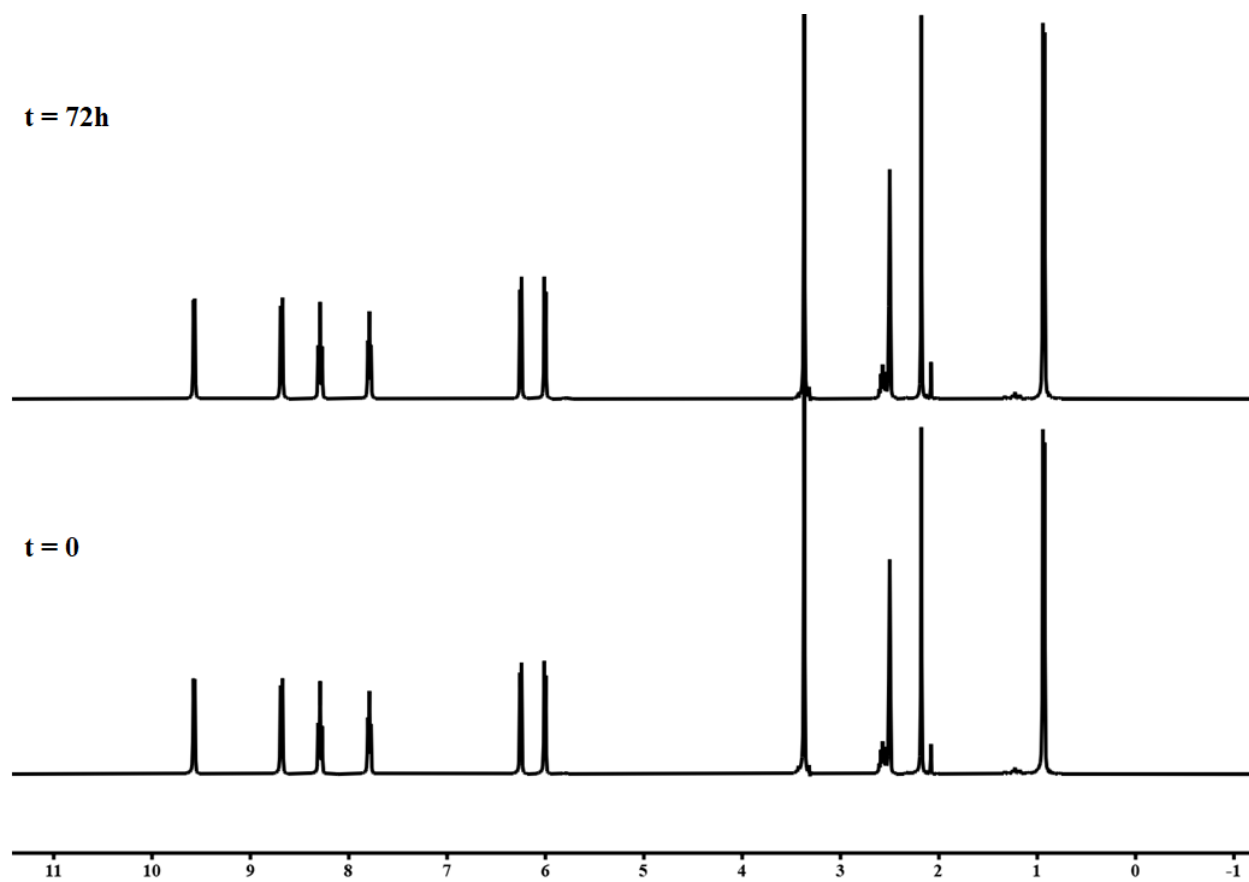

**Figure S29.** Time course  $^1\text{H}$  NMR spectrum of **2** in  $\text{dms0-}d_6$  at room temperature.

## Experimental

### *General procedures and materials*

$^1\text{H}$  NMR (400 or 300 MHz), and  $^{13}\text{C}\{^1\text{H}\}$  (100 MHz) spectra were recorded on a Bruker Avance instrument at 295 K. All chemical shifts ( $\delta$ ) are reported in ppm relative to their corresponding external standards ( $\text{SiMe}_4$  for  $^1\text{H}$  and  $^{13}\text{C}$ ) and the coupling constants ( $J$ ) have been expressed in Hz. The instrument for HR ESI-Mass measurement was a Shimadzu IT-TOF with an electrospray ionization source. Microanalyses were performed with a Thermo Finnigan Flash EA-1112 CHNSO rapid elemental analyzer. UV-vis absorption spectra were carried out using an Ultrospec 4000 Pro or JASCO V-770 UVVisible/NIR. All the reactions were carried out under Argon atmosphere and in the common solvents and all solvents were purified and dried according to standard procedures.<sup>1</sup>

### *X-ray structure determination*

The appropriate crystals of **2** were obtained by slow evaporation of  $\text{CH}_3\text{CN}$  solution of **2** at room temperature. Single crystal X-ray diffraction intensity data of **2** was collected at 100(2) K using a Bruker APEX-II CCD diffractometer equipped with graphite monochromated  $\text{MoK}\alpha$  radiation ( $\lambda = 0.71073 \text{ \AA}$ ). Data reduction was carried out using the program Bruker SAINT<sup>2</sup> and an empirical absorption correction was applied based on multi-scan method.<sup>3</sup> The structure of **2** was solved by direct method and refined by the full-matrix least-square technique on  $|F|^2$  with anisotropic thermal parameters to describe the thermal motions of all non-hydrogen atoms using the programs (SHELXS-14)<sup>4</sup> and (SHELXL-18),<sup>5</sup> respectively. All hydrogen atoms were located

from difference Fourier map and refined isotropically. The summary of crystal data and relevant structure refinement parameters for **2** (CCDC 2223210) is given in Table S9.

### ***Computational details***

Density functional calculations were performed with the program suite Gaussian 09<sup>6</sup> using the B3LYP level of theory.<sup>7-9</sup> The LanL2DZ basis set was chosen to describe Ru<sup>10, 11</sup> and the 6-31g(d) basis set was chosen for other atoms. The geometries of complexes were fully optimized by employing the density functional theory without imposing any symmetry constraints. In order to ensure the optimized geometries, frequency calculations were performed employing analytical second derivatives. Time-dependent DFT (TD-DFT) calculations were carried out at the same level of theory and basis sets. Solvent effects have been considered by the conductor-like polarizable continuum model (CPCM).<sup>12, 13</sup> The calculations for the electronic absorption spectra by TD-DFT were performed at the same level of theory.

### ***Biological assay***

#### ***Cell lines and cell culture***

Human cancer cell lines, MCF-7 (breast cancer), A549 (non-small cell lung cancer), and HeLa (Cervix), were purchased from National Cell Bank of Iran (NCBI, Pasteur Institute, Tehran, Iran). The cells were grown in complete culture media containing RPMI 1640 (Biosera, France), 10% fetal bovine serum (FBS; Gibco, USA) and 1% penicillin–streptomycin (Biosera, France) and kept at 37 °C in a humidified CO<sub>2</sub> incubator. MRC5 cells (human breast epithelial cell line) were cultured in DMEM/Ham's F-12 (GIBCO-Invitrogen, Carlsbad, CA) supplemented with 100 mg/mL cholera toxin, 20 mg/mL epidermal growth factor (EGF), 0.01 mg/mL insulin, 500 mg/mL hydrocortisone, and 5% chelex-treated horse serum.



A standard 3-(4,5-dimethylthiazol-yl)-2,5-diphenyl-tetrazolium bromide (MTT) assay has been used to determine the cytotoxic activities of non-small cell lung cancer, as previously described<sup>14, 15</sup>. To do this, the cells were seeded in 96-well microplates with a density of  $0.8 \times 10^4$  cells per well and kept for 24h to recover. The cells were then treated in a triplicate manner with compounds (**A**, **1**, and **2**) at varying concentrations ranging from 1 to 100  $\mu$ M and incubated in a humidified CO<sub>2</sub> incubator for at least 72 hours at 37 °C. The media was completely discarded after incubation and replaced with 150  $\mu$ L of RPMI 1640 containing 0.5 mg/mL MTT solution and incubated for 3h at room temperature. The media containing MTT was discarded again to dissolve the formazan crystals and 150  $\mu$ L of dmsO was applied to each well and incubated in the dark for at least 30 min at 37 °C. The absorbance of individual well was then read by ELISA reader at 490 nm. CurveExpert 1.4 was used to measure the 50% inhibitory concentration of each compound, reflecting IC<sub>50</sub>. The data are is given as mean  $\pm$  SD.

#### *Apoptosis assay*

$2 \times 10^5$  of MCF-7 cells are pre-cultured for 16 hours followed by exposure to **2** complexes for 24 hours. After mentioned time, AnnexinV/PI staining was performed using eBioscience™ Annexin Vapoptosis detection kit (Invitrogen). Cells were washed once with phosphate buffered saline (PBS), and once with 1000  $\mu$ L 1X binding buffer. In the next step, the cells were suspended with 100  $\mu$ L of binding buffer containing 5  $\mu$ L of Annexin V-fluorescein isothiocyanate for 15 minutes. Afterward, cells were washed again with 1000  $\mu$ L Binding buffer and resuspended in 200  $\mu$ L of the same buffer containing 5  $\mu$ L Propodium Iodide (PI) solution. The apoptosis rates were then determined by BD FACS Calibur™ flow cytometry (BD Biosciences, San Jose, CA, USA). The apoptosis rates were calculated as the sum of early apoptosis and late apoptosis.<sup>16</sup>

#### *Shift mobility assay*

Gel electrophoresis analysis was performed using 500 ng plasmid, pBlu2KSM, DNA in 10 mM Tris-HCl buffer, pH 7.4 with the final concentrations of 20–150  $\mu\text{M}$  complex in a total volume of 10  $\mu\text{l}$ . The samples were then incubated for 60 min at 37  $^{\circ}\text{C}$ , followed by electrophoresis on 1% agarose gel in TAE buffer containing 1.0  $\mu\text{g ml}^{-1}$  safe stain at 100 V for 30 min and finally, photographed under UV light. To investigate the DNA-ligand ability of each compound to unwind the supercoiled conformation of pBlu2KSM was determined by electrophoretic mobility on native plasmid. As expected, three different pBlu2KSM conformations were observed on the agarose gels. These were the negative open circular form (NSC) as well as single break nicked supercoil (SSNSC) and a strong bond of the positive twisted supercoiled (PSC). The double strand break of the circular supercoil transform circular DNA to linear (L) format with real length of plasmid is shown as these conformations resolve on agarose gels as distinct bands.

### ***Docking procedure***

The two distinct DNA 3D crystal structures (PDB ID: 1BNA, and 1LU5) as well as BSA (PDB ID: 4F5S) have been obtained from the protein data bank ([www.rcsb.org/pdb](http://www.rcsb.org/pdb)). Co-crystal ligand were extracted from the structures of PDBs. Then, to convert these corrected PDB files to PDBQT, MGLtools 1.5.6 was applied. For the preparation of ligands, the structure of non-small cell lung cancer was sketched using HyperChem Professional (Version 8, Hypercube Inc., Gainesville, FL, USA). Each complex has been optimized using HyperChem 8 by molecular mechanical methods (MM+), followed by measurements of energy minimization at Hartree-Fock (HF) level, using Gaussian 09. Afterwards, the output structures were converted to PDBQT using MGLtools 1.5.6. After the preparation of ligands and receptors, the ligands were docked to DNA using AutoDock 4.2, based on Lamarckian genetic algorithm. By centering the grid box on the minor groove, major groove, and the intercalation site to cover the complete DNA structure, the

grid core on the DNA structures was preserved. The other parameters have all been kept at their default values. In the gpf and dpf data, metal ions parameters (here Ruthenium) for docking were added. With regard to the AutoDock scoring feature, based on the lowest docking binding energy conformation, the best binding mode of ligands and receptors was selected. Docking pose analysis was done using discovery studio visualizer and AutoDock Software 1.5.6.

### **Cartesian coordinates**

#### **A, ground state gas phase**

|   |           |           |           |
|---|-----------|-----------|-----------|
| O | 0.267300  | 2.010600  | -0.636800 |
| N | 0.869800  | -1.333500 | 0.315800  |
| N | 0.902200  | 0.963200  | -0.296300 |
| N | -1.821200 | 0.580300  | 0.986100  |
| N | -1.878700 | -0.904800 | -0.892400 |
| C | 2.206800  | -1.348700 | 0.338900  |
| H | 2.680200  | -2.297400 | 0.580300  |
| C | 2.970300  | -0.208000 | 0.067700  |
| C | 2.271100  | 0.944900  | -0.255400 |
| H | 2.724000  | 1.894600  | -0.512700 |
| C | 0.240300  | -0.214900 | 0.025300  |
| C | -1.255000 | -0.164200 | 0.028600  |
| C | -3.156200 | 0.586800  | 1.006800  |
| H | -3.625000 | 1.187100  | 1.784800  |
| C | -3.920300 | -0.133800 | 0.089200  |
| H | -5.005000 | -0.118600 | 0.112000  |
| C | -3.216500 | -0.878600 | -0.852900 |
| H | -3.732700 | -1.476100 | -1.602400 |
| C | 4.476500  | -0.212000 | 0.131600  |
| H | 4.912500  | 0.442900  | -0.629500 |
| H | 4.871600  | -1.221100 | -0.019400 |
| H | 4.828600  | 0.138600  | 1.109700  |

#### **A, ground state dmso solution**

|   |          |           |           |
|---|----------|-----------|-----------|
| O | 0.306100 | 2.038100  | -0.660200 |
| N | 0.853000 | -1.319400 | 0.311600  |

|   |           |           |           |
|---|-----------|-----------|-----------|
| N | 0.919800  | 0.971100  | -0.301200 |
| N | -1.837000 | 0.705100  | 0.882400  |
| N | -1.873900 | -1.000900 | -0.798100 |
| C | 2.188000  | -1.353200 | 0.342500  |
| H | 2.648600  | -2.307400 | 0.584600  |
| C | 2.971400  | -0.221700 | 0.077200  |
| C | 2.287200  | 0.936400  | -0.252500 |
| H | 2.758700  | 1.876500  | -0.510300 |
| C | 0.237000  | -0.187400 | 0.018600  |
| C | -1.257800 | -0.141300 | 0.021000  |
| C | -3.174800 | 0.685300  | 0.913900  |
| H | -3.654500 | 1.363500  | 1.616300  |
| C | -3.927500 | -0.157300 | 0.097100  |
| H | -5.011200 | -0.162100 | 0.127300  |
| C | -3.214400 | -0.996200 | -0.754100 |
| H | -3.723900 | -1.687700 | -1.421600 |
| C | 4.475000  | -0.248700 | 0.150800  |
| H | 4.919200  | 0.544000  | -0.457200 |
| H | 4.864800  | -1.211300 | -0.193300 |
| H | 4.811400  | -0.106600 | 1.184900  |

**1, ground state, gas phase**

|    |           |           |           |
|----|-----------|-----------|-----------|
| Ru | -1.877000 | 0.078300  | 0.252900  |
| Ru | 1.877100  | -0.078100 | 0.253100  |
| Cl | -1.862000 | -2.355900 | 0.257100  |
| Cl | 1.862500  | 2.356100  | 0.256800  |
| Cl | 0.000100  | 0.000100  | -1.402200 |
| Cl | -0.000100 | 0.000400  | 1.908500  |
| C  | -2.491000 | 2.130200  | 1.027300  |
| C  | -3.262400 | 1.086300  | 1.654200  |
| H  | -3.217200 | 0.973400  | 2.732500  |
| C  | -3.989000 | 0.145500  | 0.891200  |
| H  | -4.484800 | -0.677200 | 1.395200  |
| C  | -3.974200 | 0.177000  | -0.548800 |
| C  | -3.178400 | 1.180000  | -1.156800 |
| H  | -3.036700 | 1.171900  | -2.230900 |
| C  | -2.457700 | 2.150900  | -0.383200 |
| H  | -1.786900 | 2.837200  | -0.888400 |
| C  | -1.680400 | 3.098500  | 1.843200  |
| H  | -2.240500 | 4.033600  | 1.977000  |

|   |           |           |           |
|---|-----------|-----------|-----------|
| H | -0.729100 | 3.320200  | 1.350800  |
| H | -1.456300 | 2.687600  | 2.830800  |
| C | -4.749100 | -0.870800 | -1.326600 |
| H | -4.675500 | -1.796700 | -0.743000 |
| C | -6.234900 | -0.458400 | -1.401900 |
| H | -6.662900 | -0.293500 | -0.406400 |
| H | -6.818900 | -1.244400 | -1.893600 |
| H | -6.358600 | 0.465700  | -1.979800 |
| C | -4.177600 | -1.164200 | -2.719800 |
| H | -4.278700 | -0.306000 | -3.396000 |
| H | -4.727000 | -1.997000 | -3.171400 |
| H | -3.122400 | -1.447000 | -2.658700 |
| C | 2.490800  | -2.129800 | 1.028200  |
| C | 2.457300  | -2.151000 | -0.382300 |
| H | 1.786300  | -2.837400 | -0.887200 |
| C | 3.178000  | -1.180500 | -1.156400 |
| H | 3.036000  | -1.172700 | -2.230500 |
| C | 3.974100  | -0.177400 | -0.548900 |
| C | 3.989200  | -0.145400 | 0.891000  |
| H | 4.485200  | 0.677400  | 1.394600  |
| C | 3.262600  | -1.085800 | 1.654600  |
| H | 3.217700  | -0.972600 | 2.732800  |
| C | 1.680300  | -3.097800 | 1.844600  |
| H | 0.729100  | -3.319900 | 1.352200  |
| H | 1.456000  | -2.686200 | 2.831900  |
| H | 2.240600  | -4.032600 | 1.979100  |
| C | 4.748900  | 0.870000  | -1.327200 |
| H | 4.675500  | 1.796100  | -0.744000 |
| C | 4.177400  | 1.162800  | -2.720500 |
| H | 4.278300  | 0.304400  | -3.396400 |
| H | 4.726800  | 1.995500  | -3.172500 |
| H | 3.122200  | 1.445800  | -2.659500 |
| C | 6.234700  | 0.457500  | -1.402500 |
| H | 6.358300  | -0.466900 | -1.980000 |
| H | 6.662800  | 0.292900  | -0.407000 |
| H | 6.818700  | 1.243200  | -1.894600 |

**1**, ground state, dmso solution

|    |           |           |           |
|----|-----------|-----------|-----------|
| Ru | 1.923200  | 0.053800  | -0.258200 |
| Ru | -1.923200 | -0.053700 | -0.258300 |

|    |           |           |           |
|----|-----------|-----------|-----------|
| Cl | 1.860300  | -2.414300 | -0.268300 |
| Cl | -1.860600 | 2.414400  | -0.267900 |
| Cl | -0.000100 | -0.000000 | 1.385200  |
| Cl | 0.000000  | 0.000300  | -1.902000 |
| C  | 2.657300  | 2.057900  | -1.097500 |
| C  | 3.390200  | 0.956900  | -1.664500 |
| H  | 3.383400  | 0.810200  | -2.739100 |
| C  | 4.061400  | 0.026700  | -0.843000 |
| H  | 4.551600  | -0.824700 | -1.302200 |
| C  | 4.024200  | 0.124400  | 0.591400  |
| C  | 3.244900  | 1.172400  | 1.139100  |
| H  | 3.092400  | 1.225900  | 2.210200  |
| C  | 2.584100  | 2.135600  | 0.309400  |
| H  | 1.960600  | 2.892200  | 0.772300  |
| C  | 1.958600  | 3.049200  | -1.982200 |
| H  | 2.676800  | 3.816500  | -2.298300 |
| H  | 1.137400  | 3.542200  | -1.456500 |
| H  | 1.563400  | 2.567300  | -2.880200 |
| C  | 4.781000  | -0.888600 | 1.429500  |
| H  | 4.679900  | -1.852600 | 0.916200  |
| C  | 6.278800  | -0.509500 | 1.440100  |
| H  | 6.686300  | -0.439700 | 0.425700  |
| H  | 6.849200  | -1.270800 | 1.982900  |
| H  | 6.435100  | 0.454300  | 1.938600  |
| C  | 4.244000  | -1.054400 | 2.856900  |
| H  | 4.397900  | -0.151300 | 3.459100  |
| H  | 4.778400  | -1.870900 | 3.353200  |
| H  | 3.176200  | -1.297000 | 2.860600  |
| C  | -2.657300 | -2.057500 | -1.098300 |
| C  | -2.583900 | -2.135800 | 0.308600  |
| H  | -1.960300 | -2.892500 | 0.771100  |
| C  | -3.244600 | -1.172900 | 1.138700  |
| H  | -3.092000 | -1.226900 | 2.209800  |
| C  | -4.024100 | -0.124800 | 0.591600  |
| C  | -4.061400 | -0.026500 | -0.842800 |
| H  | -4.551800 | 0.825100  | -1.301600 |
| C  | -3.390300 | -0.956300 | -1.664800 |
| H  | -3.383700 | -0.809200 | -2.739400 |
| C  | -1.958600 | -3.048400 | -1.983500 |
| H  | -1.137300 | -3.541500 | -1.458100 |

|   |           |           |           |
|---|-----------|-----------|-----------|
| H | -1.563600 | -2.566000 | -2.881400 |
| H | -2.676800 | -3.815600 | -2.299800 |
| C | -4.780900 | 0.887900  | 1.430200  |
| H | -4.679700 | 1.852100  | 0.917300  |
| C | -4.243800 | 1.052900  | 2.857600  |
| H | -4.397900 | 0.149500  | 3.459400  |
| H | -4.778200 | 1.869200  | 3.354300  |
| H | -3.176000 | 1.295500  | 2.861500  |
| C | -6.278700 | 0.508800  | 1.440500  |
| H | -6.435000 | -0.455200 | 1.938600  |
| H | -6.686200 | 0.439700  | 0.426100  |
| H | -6.849000 | 1.269900  | 1.983800  |

2, ground state, gas phase

|    |             |             |             |
|----|-------------|-------------|-------------|
| Ru | 0.70451500  | -0.37162800 | -0.42220200 |
| Cl | -0.18149100 | -0.94917300 | -2.59128300 |
| O  | -4.14603700 | 1.32570700  | 0.73904200  |
| N  | -1.27361100 | -0.68447900 | 0.25467600  |
| N  | -3.38622300 | 0.33012700  | 0.67333900  |
| N  | -2.23109200 | 2.71270700  | -0.56227300 |
| N  | -0.20981800 | 1.47157800  | -0.77478800 |
| C  | -1.73743000 | -1.87141800 | 0.64251300  |
| H  | -1.04733200 | -2.70386600 | 0.60683800  |
| C  | -3.07244100 | -2.03490900 | 1.05485000  |
| C  | -3.86259600 | -0.90926500 | 1.06605100  |
| H  | -4.89976400 | -0.87823600 | 1.37496300  |
| C  | -2.07293600 | 0.40312900  | 0.22235000  |
| C  | -1.50909400 | 1.61383200  | -0.37797700 |
| C  | -1.65705900 | 3.73371600  | -1.20188400 |
| H  | -2.27103400 | 4.62055400  | -1.33831400 |
| C  | -0.34965500 | 3.67028300  | -1.68327900 |
| H  | 0.10744800  | 4.49057300  | -2.22452000 |
| C  | 0.34673000  | 2.49210500  | -1.44731300 |
| H  | 1.35797600  | 2.34121400  | -1.80404000 |
| C  | -3.60854900 | -3.38198300 | 1.45990600  |
| H  | -3.61463400 | -4.06507800 | 0.60260700  |
| H  | -4.63000200 | -3.30674400 | 1.83998300  |
| H  | -2.98577400 | -3.83457900 | 2.23926800  |
| C  | 2.33335200  | 0.29915500  | 1.10457600  |
| C  | 2.84761200  | 0.36099600  | -0.23799400 |

|   |            |             |             |
|---|------------|-------------|-------------|
| H | 3.22014400 | 1.30996600  | -0.61286500 |
| C | 2.83991600 | -0.75343700 | -1.09290700 |
| H | 3.17736200 | -0.64925600 | -2.11832300 |
| C | 2.34957200 | -2.03179700 | -0.64156000 |
| C | 1.81755000 | -2.08981100 | 0.65736000  |
| H | 1.39230300 | -3.02249700 | 1.01431800  |
| C | 1.78565500 | -0.93647900 | 1.51079800  |
| H | 1.32450200 | -1.02552300 | 2.48790300  |
| C | 2.42228700 | 1.52049300  | 2.00335100  |
| H | 2.28660300 | 2.39896800  | 1.35723500  |
| C | 1.35169800 | 1.57413400  | 3.10182200  |
| H | 1.49151700 | 0.78340200  | 3.84793000  |
| H | 0.33965700 | 1.48724000  | 2.69058300  |
| H | 1.41720200 | 2.52862100  | 3.63268200  |
| C | 3.84315300 | 1.60140600  | 2.60704200  |
| H | 4.03696300 | 0.74779600  | 3.26637000  |
| H | 3.94555900 | 2.51660600  | 3.19893600  |
| H | 4.61651500 | 1.61313000  | 1.83141200  |
| C | 2.36208400 | -3.21585300 | -1.56419900 |
| H | 1.84356400 | -2.97377100 | -2.49787500 |
| H | 1.87589200 | -4.08317700 | -1.11054700 |
| H | 3.39640900 | -3.48875300 | -1.80591100 |

## 2, ground state, dms0 solution

|    |             |             |             |
|----|-------------|-------------|-------------|
| Ru | 0.70451500  | -0.37162800 | -0.42220200 |
| Cl | -0.18149000 | -0.94917300 | -2.59128300 |
| O  | -4.14603700 | 1.32570700  | 0.73904200  |
| N  | -1.27361100 | -0.68447900 | 0.25467600  |
| N  | -3.38622300 | 0.33012700  | 0.67333900  |
| N  | -2.23109200 | 2.71270700  | -0.56227300 |
| N  | -0.20981700 | 1.47157800  | -0.77478900 |
| C  | -1.73743000 | -1.87141800 | 0.64251300  |
| H  | -1.04733200 | -2.70386600 | 0.60683800  |
| C  | -3.07244100 | -2.03490900 | 1.05485000  |
| C  | -3.86259600 | -0.90926500 | 1.06605100  |
| H  | -4.89976400 | -0.87823500 | 1.37496300  |
| C  | -2.07293600 | 0.40312900  | 0.22235000  |
| C  | -1.50909400 | 1.61383200  | -0.37797700 |
| C  | -1.65705900 | 3.73371600  | -1.20188400 |
| H  | -2.27103400 | 4.62055400  | -1.33831400 |



|   |             |             |             |
|---|-------------|-------------|-------------|
| C | -0.34965500 | 3.67028300  | -1.68328000 |
| H | 0.10744800  | 4.49057200  | -2.22452000 |
| C | 0.34673000  | 2.49210500  | -1.44731300 |
| H | 1.35797600  | 2.34121400  | -1.80404000 |
| C | -3.60854900 | -3.38198300 | 1.45990600  |
| H | -3.61463400 | -4.06507800 | 0.60260700  |
| H | -4.63000200 | -3.30674300 | 1.83998300  |
| H | -2.98577400 | -3.83457900 | 2.23926800  |
| C | 2.33335200  | 0.29915500  | 1.10457600  |
| C | 2.84761100  | 0.36099600  | -0.23799400 |
| H | 3.22014400  | 1.30996600  | -0.61286500 |
| C | 2.83991600  | -0.75343700 | -1.09290600 |
| H | 3.17736300  | -0.64925600 | -2.11832300 |
| C | 2.34957300  | -2.03179700 | -0.64155900 |
| C | 1.81755000  | -2.08981100 | 0.65736100  |
| H | 1.39230300  | -3.02249700 | 1.01431900  |
| C | 1.78565500  | -0.93647900 | 1.51079800  |
| H | 1.32450100  | -1.02552200 | 2.48790300  |
| C | 2.42228700  | 1.52049300  | 2.00335100  |
| H | 2.28660200  | 2.39896800  | 1.35723500  |
| C | 1.35169800  | 1.57413300  | 3.10182300  |
| H | 1.49151700  | 0.78340200  | 3.84793000  |
| H | 0.33965700  | 1.48724000  | 2.69058300  |
| H | 1.41720200  | 2.52862000  | 3.63268200  |
| C | 3.84315300  | 1.60140700  | 2.60704200  |
| H | 4.03696300  | 0.74779600  | 3.26637000  |
| H | 3.94555900  | 2.51660600  | 3.19893600  |
| H | 4.61651500  | 1.61313100  | 1.83141200  |
| C | 2.36208400  | -3.21585300 | -1.56419900 |
| H | 1.84356400  | -2.97377100 | -2.49787500 |
| H | 1.87589200  | -4.08317700 | -1.11054700 |
| H | 3.39640900  | -3.48875300 | -1.80591000 |

## References

1. Armarego, W. L., *Purification of laboratory chemicals*. Butterworth-Heinemann 2017.
2. Bruker *SAINT*, Version 6.36 a. *Bruker-AXS Inc.: Madison, WI, USA 2002*.
3. Bruker *SMART*, Version 5.625 and *SADABS*, version 2.03 a. *Bruker AXS Inc., Madison, Wisconsin 2001*.
4. Sheldrick, G. M., A short history of *SHELX*. *Acta Cryst.* **2008**, *A64*, 112-122.
5. Sheldrick, G. M., Crystal structure refinement with *SHELXL*. *Acta Cryst.* **2015**, *C27*, 3-8.
6. Frisch, M. J.; Trucks, G. W.; Schlegel, H. B.; Scuseria, G. E.; Robb, M. A.; Cheeseman, J. R.; Scalmani, G.; Barone, V.; Mennucci, B.; Petersson, G. A.; Nakatsuji, H.; Caricato, M.; Li, X.; Hratchian, H. P.; Izmaylov, A. F.; Bloino, J.; Zheng, G.; Sonnenberg, J. L.; Hada, M.; Ehara, M.; Toyota, K.; Fukuda, R.; Hasegawa, J.; Ishida, M.; Nakajima, T.; Honda, Y.; Kitao, O.; Nakai, H.; Vreven, T.; Montgomery, J. J. A.; Peralta, J. E.; Ogliaro, F.; Bearpark, M.; Heyd, J. J.; Brothers, E.; Kudin, K. N.; Staroverov, V. N.; Keith, T.; Kobayashi, R.; Normand, J.; Raghavachari, K.; Rendell, A.; Burant, J. C.; Iyengar, S. S.; Tomasi, J.; Cossi, M.; Rega, N.; Millam, J. M.; Klene, M.; Knox, J. E.; Cross, J. B.; Bakken, V.; Adamo, C.; Jaramillo, J.; Gomperts, R.; Stratmann, R. E.; Yazyev, O.; Austin, A. J.; Cammi, R.; Pomelli, C.; Ochterski, J. W.; Martin, R. L.; Morokuma, K.; Zakrzewski, V. G.; Voth, G. A.; Salvador, P.; Dannenberg, J. J.; Dapprich, S.; Daniels, A. D.; Farkas, O.; Foresman, J. B.; Ortiz, J. V.; Cioslowski, J.; Fox, D. J., *Gaussian 09, Revision A.02*. 2016; p Gaussian, Inc., Wallingford CT.
7. Becke, A. D., Density-functional Thermochemistry. III. The Role of Exact Exchange. *J. Chem. Phys.* **1993**, *98*, 5648-5652.

8. Miehlich, B.; Savin, A.; Stoll, H.; Preuss, H., Results Obtained with the Correlation Energy Density Functionals of Becke and Lee, Yang and Parr. *Chem. Phys. Lett.* **1989**, *157*, 200-206.
9. Lee, C.; Yang, W.; Parr, R. G., Development of the Colle-Salvetti Correlation-Energy Formula into a Functional of the Electron Density. *Phys. Rev. B* **1988**, *37*, 785.
10. Wadt, W. R.; Hay, P. J., Ab Initio Effective Core Potentials for Molecular Calculations. Potentials for Main Group Elements Na to Bi. *J. Chem. Phys.* **1985**, *82*, 284-298.
11. Roy, L. E.; Hay, P. J.; Martin, R. L., Revised Basis Sets for the LANL Effective Core Potentials. *J. Chem. Theory Comput.* **2008**, *4*, 1029-1031.
12. Cossi, M.; Scalmani, G.; Rega, N.; Barone, V., New Developments in the Polarizable Continuum Model for Quantum Mechanical and Classical Calculations on Molecules in Solution. *J. Chem. Phys.* **2002**, *117*, 43-54.
13. Barone, V.; Cossi, M.; Tomasi, J., A New Definition of Cavities for the Computation of Solvation Free Energies by the Polarizable Continuum Model. *J. Chem. Phys.* **1997**, *107*, 3210-3221.
14. Fereidoonzhad, M.; Shahsavari, H. R.; Abedanzadeh, S.; Nezafati, A.; Khazali, A.; Mastroilli, P.; Babaghasabha, M.; Webb, J.; Faghieh, Z.; Faghieh, Z.; Beyzavi, M. H., Synthesis, structural characterization, biological evaluation and molecular docking studies of new platinum(II) complexes containing isocyanides. *New J. Chem.* **2018**, *42*, 8681-8692.
15. Fereidoonzhad, M.; Shahsavari, H. R.; Abedanzadeh, S.; Behchenari, B.; Hossein-Abadi, M.; Faghieh, Z.; Beyzavi, M. H., Cycloplatinated(II) complexes bearing 1,1'-

bis(diphenylphosphino)ferrocene ligand: biological evaluation and molecular docking studies. *New J. Chem.* **2018**, *42*, 2385-2392.

16. Fereidoonzhad, M.; Kaboudin, B.; Mirzaee, T.; Babadi Aghakhanpour, R.; Golbon Haghighi, M.; Faghih, Z.; Faghih, Z.; Ahmadipour, Z.; Notash, B.; Shamsavari, H. R., Cyclometalated Platinum(II) Complexes Bearing Bidentate O, O'-Di(alkyl)dithiophosphate Ligands: Photoluminescence and Cytotoxic Properties. *Organometallics* **2017**, *36*, 1707-1717.
